# Supplementary material for: Economic burden of cirrhosis in Catalonia: a population-based analysis
Source: PubMed Central journal article supplement — BMJ Open. 2018 Mar 3;8(3):e018012. doi: 10.1136/bmjopen-2017-018012 (PMC5855312; doi:10.1136/bmjopen-2017-018012), 2018-03-03
Supplement: bmjopen-2017-018012.draft_revisions.pdf [file bmjopen-2017-018012.draft_revisions.pdf]

# BMJ Open

BMJ Open is committed to open peer review. As part of this commitment we make the peer review history of every article we publish publicly available.

When an article is published we post the peer reviewers' comments and the authors' responses online. We also post the versions of the paper that were used during peer review. These are the versions that the peer review comments apply to.

The versions of the paper that follow are the versions that were submitted during the peer review process. They are not the versions of record or the final published versions. They should not be cited or distributed as the published version of this manuscript.

BMJ Open is an open access journal and the full, final, typeset and author-corrected version of record of the manuscript is available on our site with no access controls, subscription charges or pay-per-view fees (<http://bmjopen.bmj.com>).

If you have any questions on BMJ Open's open peer review process please email [editorial.bmjopen@bmj.com](mailto:editorial.bmjopen@bmj.com)

# BMJ Open

## ECONOMIC BURDEN OF CIRRHOSIS IN CATALONIA:A POPULATION- BASED ANALYSIS

|                                 |                                                                                                                                                                                                                                                                                                                                                                                                                                                                                                                             |
|---------------------------------|-----------------------------------------------------------------------------------------------------------------------------------------------------------------------------------------------------------------------------------------------------------------------------------------------------------------------------------------------------------------------------------------------------------------------------------------------------------------------------------------------------------------------------|
| Journal:                        | <i>BMJ Open</i>                                                                                                                                                                                                                                                                                                                                                                                                                                                                                                             |
| Manuscript ID                   | bmjopen-2017-018012                                                                                                                                                                                                                                                                                                                                                                                                                                                                                                         |
| Article Type:                   | Research                                                                                                                                                                                                                                                                                                                                                                                                                                                                                                                    |
| Date Submitted by the Author:   | 05-Jun-2017                                                                                                                                                                                                                                                                                                                                                                                                                                                                                                                 |
| Complete List of Authors:       | Miquel, Mireia; Hospital de Sabadell, Corporació Sanitària Parc Tauli, Autonomous University of Barcelona, Digestive Disease Department,; Instituto de Salud Carlos III, CIBERHED<br>Cleries, Montserrat ; Servei Català de la Salut, Generalitat de Catalunya, Unitat d'informació i Coneixement<br>Vergara, Mercedes; Corporació Sanitària Parc Tauli, Autonomous University of Barcelona, Digestive Disease; Instituto de Salud Carlos III, CIBEREHD<br>Vera, Emili; Servei Català de la Salut, Generalitat de Catalunya |
| <b>Primary Subject Heading</b>: | Gastroenterology and hepatology                                                                                                                                                                                                                                                                                                                                                                                                                                                                                             |
| Secondary Subject Heading:      | Health economics, Health informatics                                                                                                                                                                                                                                                                                                                                                                                                                                                                                        |
| Keywords:                       | cirrhosis, economic expenditures, population study, adjusted morbidity groups                                                                                                                                                                                                                                                                                                                                                                                                                                               |
|                                 |                                                                                                                                                                                                                                                                                                                                                                                                                                                                                                                             |

SCHOLARONE™  
Manuscripts

Only

1  
2  
3 **ECONOMIC BURDEN OF CIRRHOSIS IN CATALONIA:A POPULATION-**  
4 **BASED ANALYSIS**

5  
6 Mireia Miquel (1,2), Montserrat Clèries (3), Mercedes Vergara (1,2), Emili

7  
8 Vela(3)

9  
10 (1) Digestive Disease Department,Hospital de Sabadell, Corporació Sanitària  
11 Parc Tauli, Autonomous University of Barcelona. Sabadell, Spain. (2)  
12 CIBERhed, Instituto Carlos III. Madrid, Spain. (3) Unitat d'informació i  
13 Coneixement, Servei Català de la Salut, Generalitat de Catalunya. Barcelona,  
14 Spain.  
15  
16  
17  
18  
19  
20

21 **CORRESPONDING AUTHOR:**

22  
23 Mireia Miquel

24  
25 H.U. ParcTauli

26  
27 ParcTauli s/n

28  
29 08206 Sabadell,

30  
31 email: mmiquel@tauli.cat

32  
33 Telephone: +34 93 745 83 56

34  
35 Fax :+34 93 745 82 42  
36  
37  
38

39 **Electronic word count for main body of manuscript:** 4787 words without  
40  
41 tables.  
42

43  
44 Number of tables and figures: 3 tables and 4 figures.  
45  
46  
47

48 **Keywords:** Economic expenditures, cirrhosis, population study, Adjusted  
49  
50 Morbidity Groups  
51  
52  
53  
54  
55  
56  
57  
58  
59  
60

1  
2  
3  
4  
5  
6  
7  
8  
9  
10  
11 **List of Abbreviations:**  
12  
13  
14

15 ICD-9CM: Clinical Modification of the International Classification of Diseases,  
16  
17 9th Revision codes  
18

19 DRG: Diagnosis-related group  
20

21 AMG: Adjusted morbidity Groups  
22

23 ANOVA: Analysis of variance  
24

25 CI: confidence interval  
26  
27  
28  
29  
30  
31  
32  
33  
34  
35  
36  
37  
38  
39  
40  
41  
42  
43  
44  
45  
46  
47  
48  
49  
50  
51  
52  
53  
54  
55  
56  
57  
58  
59  
60

## ABSTRACT

**Backgrounds:** Cirrhosis is a chronic disease with high morbidity and mortality. Few studies have evaluated healthcare resource use in patients with cirrhosis.

**Objective:** We aimed to describe the population-level distribution of healthcare resource use and expenditures in a non-selected population of cirrhotic patients stratified in function of whether their disease was compensated or decompensated and in function of comorbidity burden.

**Methods:** This is a population study included all known patients with cirrhosis in Catalonia, Spain, on December 31, 2012. The inclusion criteria were all cirrhotic patients according to ICD-9 over 18 years old. We evaluated healthcare resource use and expenditure during 2013, taking into account the presence of decompensation before or during 2012.

**Results:** We documented 34,740 patients diagnosed with cirrhosis (58.7% men; mean age 61.8±14 years), yielding a prevalence of 460 per 100,000 inhabitants. Annual mortality was 9.1%. During 2013, healthcare expenditures on cirrhotic patients totaled €142.1 million (€4,234 per patient), representing 1.8% of the total 2013 healthcare budget of Catalonia. Hospitalization costs accounted for 35.1% of the total expenditure, and outpatient care accounted for 22.4%. Multivariable logistic regression identified morbidity burden, HIV+, hospitalization, and emergency room visits during 2012 as independent predictors of expenditure > 85th percentile (area under the receiver operating curve, 0.88 (95%CI:0.883–0.893) P<0.001).

1  
2  
3 **Conclusions:** Cirrhosis accounts for a high proportion of healthcare resource  
4 usage and expenditures; hospitalization accounted for the greatest  
5 expenditures.  
6  
7

8  
9 **electronic count: 228**  
10

### 11 12 13 14 15 **Strengths and limitations of this study:** 16

- 17  
18 • We analyzed the use of medical resources and healthcare expenditures  
19 in cirrhotic patients in function of whether their disease was compensated  
20 or decompensated.  
21  
22
- 23  
24 • We used a population-based health risk assessment tool to calculate  
25 individuals' level morbidity burden and analyzed the impact of  
26 multimorbidity on resource use and costs.  
27  
28
- 29  
30 • Our results can help in planning resource allocation and implementing  
31 preventive policies, especially in public health systems.  
32  
33
- 34  
35 • The use of a general population database minimized selection bias and  
36 allowed us to analyze real world population. However, using  
37 administrative data to identify cirrhotic patients can lead to misdiagnosis  
38  
39  
40  
41  
42  
43  
44  
45  
46  
47  
48  
49  
50  
51  
52  
53  
54  
55

### 56 **INTRODUCTION:** 57 58 59 60

1  
2  
3 Cirrhosis is a late stage in progressive liver disease of varying etiologies. The  
4 prevalence of cirrhosis among older adults is not well known, but is expected to  
5 increase, in part due to the rising incidence of nonalcoholic fatty liver disease  
6 and the aging of the hepatitis C population[1–3]. In fact, there is an increasing  
7 trend in the diagnosis of chronic liver disease and its decompensations and  
8 complications (including hepatocellular carcinoma)[4]  
9  
10  
11  
12  
13  
14  
15  
16  
17

18 The interval between the compensated phase of cirrhosis and the development  
19 of complications (decompensated cirrhosis) is often long, with a reported  
20 median survival of 12 years[5,6]. Compared to an age-matched patients  
21 without cirrhosis, patients with cirrhosis have worse health and more comorbid  
22 conditions resulting in greater use of healthcare services, including more  
23 hospital visits, nursing home stays, and physician visits [2].  
24  
25  
26  
27  
28  
29

30 Chronic hepatitis C virus infection is one of the main causes of cirrhosis, and it  
31 is the most common indication for liver transplantation in Spain and  
32 worldwide[7,8]. Hepatitis C infection not only affects the liver, but is also related  
33 with hypertension and other cardiovascular diseases, chronic renal impairment,  
34 and diabetes mellitus. Some studies have estimated the costs of hepatitis C  
35 infection without, however, analyzing the impact of complications of advanced  
36 liver disease [4].  
37  
38  
39  
40  
41  
42  
43  
44  
45  
46  
47

48 Knowing the impact of decompensated disease on outcomes and on the cost of  
49 treating advanced liver disease is important for planning resource allocation and  
50 preventive strategies, especially in a public health system[8]. Because of its  
51  
52  
53  
54  
55  
56  
57  
58  
59  
60

1  
2  
3 importance in public health, a growing number of publications address chronic  
4  
5 liver disease [2,8–11].

6  
7 This study aimed to describe global healthcare resource use and expenditures  
8  
9 in a non-selected population of cirrhotic patients stratified into compensated vs.  
10  
11 decompensated disease.  
12  
13

## 14 15 16 17 **MATERIALS AND METHODS**

### 18 19 **Data Source and Study Design**

20  
21 We analyzed healthcare resource use and expenditures in 2013 by patients  
22  
23 with cirrhosis residing in Catalonia, an autonomous region in Northeast Spain  
24  
25 with 7,553,650 inhabitants (density, 232.8 inhabitants/km<sup>2</sup>). The regional health  
26  
27 department, named CatSalut, provides universal healthcare coverage to all  
28  
29 residents and collects detailed information on healthcare usage, including  
30  
31 information from the minimum basic dataset registered by healthcare units (e.g.,  
32  
33 hospitals, primary care centers, nursing facilities, and mental health centers).  
34  
35 CatSalut also collects information on drug prescription and billing for services  
36  
37 (e.g., outpatient visits to specialists, emergency department visits, non-urgent  
38  
39 medical transportation, outpatient rehabilitation, home oxygen therapy, and  
40  
41 dialysis). This Catalan Health Surveillance System (CHSS) contains 529 million  
42  
43 diagnoses, 440 million contacts with the various public health services, and 519  
44  
45 million prescriptions dispensed by pharmacies. Its automated data validation  
46  
47 system checks the consistency of the data and identifies potential errors.  
48  
49 Moreover, as this information is used for healthcare provider payment purposes,  
50  
51  
52  
53  
54  
55  
56  
57  
58  
59  
60



1  
2  
3 periodic external audits are carried out to ensure the quality and reliability of the  
4  
5 data.

6  
7 Information from private health centers was not available for analysis.  
8  
9 Nevertheless, private centers accounted for only 205,385 (21%) of 978,024  
10  
11 hospitalizations for all causes in Catalonia in 2013. Moreover, private centers  
12  
13 rarely hospitalize cirrhotic patients: in 2013, of 2,878 unplanned hospitalizations  
14  
15 of cirrhotic patients, 2,727(94.8%) took place in public hospitals and only 151  
16  
17 (5.2%) in private hospitals.  
18  
19

### 20 21 22 23 24 **Selection of Patients**

25  
26 This retrospective cohort study included all residents of Catalonia aged 18  
27  
28 years or older diagnosed with cirrhosis on or before 31 December 2012. The  
29  
30 International Classification of Diseases, 9th Revision, Clinical Modification (ICD-  
31  
32 9CM) codes were used to identify cases with cirrhosis (Codes: 571.2 and 571.5)  
33  
34 (see Suppinfo.Appendix1) as well as complications of cirrhosis.  
35  
36

37 We defined hepatic decompensation as an unscheduled hospital admission in  
38  
39 which the reason of income is due to hepatic encephalopathy, ascites,  
40  
41 spontaneous bacterial peritonitis, hepatorenal syndrome, or hepatic  
42  
43 complications such as hepatocellular carcinoma, esophageal varices, or portal  
44  
45 hypertension. We divided patients into three groups:  
46  
47

- 48 • Compensated group: cirrhotic patients who had not had any episodes of hepatic  
49  
50 decompensation before 2013,  
51
- 52 • Previous decompensation group: patients who had had at least one episode of  
53  
54 hepatic decompensation before 2012 but none during 2012,  
55  
56

- Recent decompensation group: patients who had at least one episode of hepatic decompensation during 2012.

### **Calculation of Expenditure**

The primary outcome variable of the study was expenditures related to healthcare resource use in 2013. In Catalonia, expenditures for healthcare and pharmacy services are normally directly attributed to each patient through their personal health identification number. Expenditures for primary care are calculated indirectly from a standard price per visit weighted by attending professional (physician or nurse) and site of assistance. Expenditures for hospital care are weighted by diagnosis-related groups (DRG). Expenditures for in-patient care at hospitals, skilled nursing facilities, and mental health centers are calculated according to length of stay (supinfo: Table 1S shows the average price by activity in Catalonia). The cost are attribute to each person through the personal identification code that is assigned in the public sanitary system.

The prices used in the calculations are the rates that CatSalut pays healthcare providers, which are published annually in the Official Gazette of the Government of Catalonia.

CatSalut's budget for 2013 was 8,085 million Euros, of which €7,885 million (97.5%) was devoted to healthcare services. Emergency medical transport and screening for breast and colon cancer accounted for the largest proportion of expenditures that were not individually allocated. The healthcare services in CatSalut's morbidity database accounted for €7,502 million (€ 968 per capita), which represents 95.1% of CatSalut's expenditure on health services.

1  
2  
3 In this population-based study, the methods used allowed us to analyze the  
4 expenditures on patients with cirrhosis, but not the costs attributable only to the  
5 disease itself. Thus, we calculated the total healthcare expenditure per person  
6 per year (in euros) for patients with cirrhosis (including cirrhosis-related care  
7 and care related to co-morbidities), rather than the expenditure specifically  
8 associated with cirrhosis care. This approach enabled a comprehensive  
9 analysis of healthcare expenditures in this group of complex patients. To  
10 account for shorter follow-up periods due to deaths, time at risk was calculated  
11 in days from 31 December 2012 to the date of death (or 365 days otherwise)  
12 and transformed to years. Thus, the unit of analysis is not the patient but rather  
13 the patient/year.  
14  
15  
16  
17  
18  
19  
20  
21  
22  
23  
24  
25  
26  
27  
28

### 29 **Assessment of predictors of increased expenditure**

30 We also sought to identify independent predictors associated with yearly  
31 expenditures greater than or equal to the 85th percentile of the distribution in  
32 the study population. This analysis included only patients who survived the  
33 whole study period (n=32,214). Predictors assessed were age, sex, co-  
34 morbidities included in the Charlson Index[12,13], previous healthcare  
35 utilization, and a novel population-based health risk assessment tool deployed  
36 in Catalonia, the Adjusted Morbidity Grouper (GMA), which is used to calculate  
37 an individual's morbidity burden [14]. The GMA categorizes each patient in a  
38 risk stratification pyramid with five strata:  
39  
40  
41  
42  
43  
44  
45  
46  
47  
48  
49

- 50 • Basal risk stratum: comprising individuals with minimum morbidity burden; 50%  
51 of individuals in the overall population of Catalonia (but 0% of cirrhotic patients)  
52 fall into this stratum.  
53  
54  
55  
56  
57  
58  
59  
60

- Low risk stratum: comprising individuals with low level complexity; 30% of individuals in the overall population of Catalonia (but 22.2% of cirrhotic patients) fall into this stratum.
- Moderate risk stratum: comprising individuals with higher complexity than the previous risk stratum; 15% of individuals in the overall population of Catalonia (but 35.6% of cirrhotic patients) fall into this stratum.
- High risk stratum: comprising individuals with a greater morbidity burden than the previous stratum; 4% of individuals in the overall population of Catalonia (but 30.6% of cirrhotic patients) fall into this stratum.
- Very high-risk stratum: comprising individuals with the highest morbidity burden; 1% of individuals in the overall population of Catalonia (but 11.6% of cirrhotic patients) fall into this stratum.

### **Statistical analysis**

Quantitative variables are reported as means±standard deviations. For the univariate analysis, we used chi-square tests to compare qualitative variables and analysis of variance (ANOVA) to compare quantitative variables. To identify independent predictors of increased healthcare expenditure, we used multivariable logistic regression. Variables were entered in the model one by one and retained when their significance was <0.10. To evaluate the discriminatory ability of the resulting predictive model for identifying cirrhotic patients with healthcare expenditures ≥85th percentile, we calculated the area under the receiver operating characteristic (ROC) curve[15]. Statistical analyses were performed using SPSS software, version 18.0. All statistical tests and

confidence intervals (CI) were constructed with a type I error level of 5%, and P-values <0.05 were considered significant.

## Ethics

Informed consent and ethics committee approval were not required because the study used retrospective data from administrative databases and patients were anonymous to the researchers.

## RESULTS

### Demographics of included patients

We documented 34,740 patients in Catalonia with cirrhosis on December 31, 2012 (460 per 100,000 inhabitants); of these 25,299 (72.8%) had never had any episodes of hepatic decompensation (Compensated group), 5,393 (15.5%) had had at least one episode of decompensation of their liver disease before 2012 (Previous decompensation group), and 4,048 (11.7%) had presented at least one hepatic decompensation during 2012 (Recent decompensation group). In the entire group, mean age was 61.2±14 years and 41.8% were women; however, the proportion of women decreased with worsening disease (44.8% in the Compensated group, 33.8% in the Previous decompensation group, and 33.4% in the Recent decompensation group).

Patients with advanced liver disease had more comorbidities, and their comorbidities were more severe than those with less advanced disease. There were no significant differences in dementia or depression between groups. (Table 1; see also Table 2S)

1  
2  
3 Alcohol abuse, hepatitis C infection and drugs ( including not only cocaine,  
4 cannabis, opioids, psychostimulants, amphetamines or other hallucinogenic  
5 substances (sniffing glue,absinthe ...) if not also sedatives, anxiolytics and  
6 hypnotics.. ) were more common in patients who had liver decompensation.  
7  
8 Compared to the Compensated group, mortality during 2013 was two times  
9  
10  
11  
12  
13  
14  
15  
16  
17  
18  
19  
20  
21  
22  
23  
24  
25  
26  
27  
28  
29  
30  
31  
32  
33  
34  
35  
36  
37  
38  
39  
40  
41  
42  
43  
44  
45  
46  
47  
48  
49  
50  
51  
52  
53  
54  
55  
56  
57  
58  
59  
60

in the Recent decompensation group.

### **Use of Health Resources**

The overall rate of hospitalizations was 44.4 per 100 patients; the rate increased with severity (29.2 in the Compensated group, 60.8 in the Previous decompensation group, and 117.9 in the Recent decompensation group;  $p < 0.0001$ ) (Table 2). Likewise, the mean length of hospitalization increased from 1.8 days in compensated patients to 4.5 days in previously decompensated patients to 9.6 days in recently decompensated patients.

The rate of hospital admissions from the emergency room in the entire group was 27 per 100 patients, being 16.5 in the Compensated group, 37.8 in the Previous decompensation group, and 78.3 in the Recent decompensation group ( $p < 0.0001$ ) Whereas 33.8% of the patients in the Compensated group presented at the emergency department at least once and 15.7% more than once, 45.5% of those in the Previous decompensation group presented at least once and 25.7% more than once, and 61.4% of those in the Recent

1  
2  
3 decompensation group presented at least once and 38.8% more than once  
4  
5 (Table 2).

6  
7 Similarly, the number of gastroenterology outpatient visits significantly  
8  
9 increased with hepatic decompensation. The number of outpatient visits to  
10  
11 other departments also increased, but the difference did not reach statistical  
12  
13 significance.  
14

15  
16  
17 All patients had frequent contact with primary care physicians and/or nurses;  
18  
19 the number of primary care visits increased with decompensation (11.8 in the  
20  
21 Compensated group, 13.4 in the Previous decompensation group, and 16.5 in  
22  
23 the Recent decompensation group;  $p < 0.0001$ ). The rate of outpatient visits to  
24  
25 mental health centers and the rate of psychiatric hospitalization did not differ  
26  
27 among groups. Moreover, the sicker patients were, the more they required  
28  
29 social services from convalescence centers, intermediate- or long-stay centers,  
30  
31 and palliative care centers  
32  
33  
34  
35  
36

### 37 **Assessment of healthcare expenditure**

38  
39 During 2013, a total of €142.1 million was spent in the care of cirrhotic patients  
40  
41 in Catalonia (1.8% of the total 2013 healthcare budget), representing an  
42  
43 average expenditure of €4,234 per patient/year.  
44

45  
46 Figure 1 displays the distribution of healthcare-related expenditures in cirrhotic  
47  
48 patients and in the general population of Catalonia. In cirrhotic patients, the  
49  
50 main source of expenditure was hospitalization (for all causes), which  
51  
52 accounted for 35.1% of the total; pharmacy costs accounted for 30%, primary  
53  
54 care for 11.8% and hospital outpatient care for 10.6%. In contrast, in the  
55  
56  
57  
58  
59  
60

1  
2  
3 general population the main source of expenses were hospitalization (27.3%),  
4 pharmacy (26.1%), primary care (23.2%) and hospital outpatient care (10.7%).  
5  
6  
7

8  
9 Figure 2 shows the distribution of healthcare-related expenditures in cirrhotic  
10 patients, stratified by age group. Despite some differences in resource use and  
11 expenditure among the different age groups, hospitalization accounted for the  
12 greatest expenditure among the different age groups, hospitalization accounted for the  
13 greatest expenditure in all groups.  
14  
15  
16

17  
18  
19 Total medical expenditure was significantly higher for patients in the Recent  
20 decompensation group than for those in the Previous decompensation and  
21 compensated group. In the Recent decompensation group, hospitalization was  
22 the main expenditure, accounting for more than half of all costs (Figure 3). By  
23 contrast, the total expenditure in the Compensated group was divided nearly  
24 equally among, pharmacy, hospitalization and outpatient care (hospital and  
25 primary care). The distribution of expenditures in the Previous decompensation  
26 group lay between those of the other two groups. Figure 3 also shows the  
27 distribution of expenditures in 2013 in patients in the Recent decompensation  
28 group according to the type of hepatic decompensation occurring in 2012;  
29 hepatorenal syndrome, followed by spontaneous bacterial peritonitis and  
30 hepatic encephalopathy, generated much higher expenditures than other  
31 complications, mainly due to hospitalization.  
32  
33  
34  
35  
36  
37  
38  
39  
40  
41  
42  
43  
44  
45  
46  
47  
48  
49

50 In cirrhotic patients, the average healthcare expenditure increased with the  
51 number of chronic comorbidities, from €773/year in patients with one  
52 comorbidity to €14,853/year in those with >9 comorbidities. The GMA stratum  
53  
54  
55  
56  
57  
58  
59  
60



1  
2  
3 was higher in patients with more comorbidities, and expenditures increased  
4 exponentially with increasing GMA strata, from less than €900 for patients in the  
5 low risk stratum to more than €15,000 for those in the very high risk stratum  
6  
7 (Figure 4).  
8  
9

10  
11 In patients with lower healthcare resource use (those with expenditures lower  
12 than the 85th percentile), expenditures were nearly equally distributed among  
13 primary care, pharmacy, and hospitalization. In patients with the highest  
14 healthcare resource use, hospitalization accounted for nearly half all  
15 expenditures; total healthcare expenditure in this group was ten times higher  
16 (€17,822 vs€1,806 patient/year) than in patients with lower resource use.  
17  
18  
19  
20  
21  
22  
23  
24  
25

26 Table 3 reports the multivariable logistic regression analysis to identify  
27 predictors of high expenditure. Morbidity burden (GMA stratum), HIV+,  
28 hospitalization, and emergency room visits during 2012 were associated with  
29 expenditures greater than or equal to the 85th percentile (i.e., > €7,275 per  
30 patient). The area under the ROC curve for identifying patients with  
31 expenditures greater than or equal to 85th percentile was 0.888 (95% CI:  
32 0.883–0.893), P <0.001.  
33  
34  
35  
36  
37  
38  
39  
40  
41  
42  
43  
44  
45

## 46 **DISCUSSION**

47  
48 In our study, liver cirrhosis had an important impact on healthcare expenditures,  
49 and expenditures on hospitalization and pharmacy accounted for the largest  
50 proportion of costs associated with treating cirrhotic patients. To our knowledge,  
51 this is the first poblational study to quantify the total economic impact of  
52  
53  
54  
55  
56  
57  
58  
59  
60

1  
2  
3 cirrhosis in relation to the hepatic decompensation and to determine the  
4 distribution of costs (including all primary care attention and nursing skills,  
5 mental health, physical therapy,...) in treating patients with this condition.  
6  
7

8  
9 This population-based study conducted in Catalonia included around 7,500,000  
10 million people, which could be comparable to some European countries which  
11 have similar number of inhabitants.  
12  
13

14  
15 In recent years, many studies have estimated the economic burden of hepatitis  
16 and cirrhosis[16] because these conditions are associated with high morbidity,  
17 mortality, and economic costs. One of them[17] analyze the cost over the last  
18 year of life in patients with an end stage liver disease but it's not a poblational  
19 study like ours. Another study [10] described the direct costs related to hospital  
20 admissions in these disease. In our study, we included all the expenses of the  
21 illness (during hospital admission and afterwards).  
22  
23  
24  
25  
26  
27  
28  
29

30  
31 There's one study which analyzed direct and indirect cost [18] of chronic liver  
32 disease which includes all the patients and not only cirrhotic ones.  
33  
34  
35  
36

37  
38 Liver cirrhosis leads to 800,000 deaths every year, representing 1.3 % of all  
39 deaths worldwide. According to the World Health Organization, cirrhosis is one  
40 of the eighteen causes of death[11]. Five-year survival is 36% in alcoholic  
41 cirrhosis and 14% in nonalcoholic cirrhosis [11]. We found that mortality  
42 increased significantly in patients who had a recent hepatic decompensation,  
43 and the risk of mortality increased nearly 20% in patients with a  
44 decompensation in the previous 12 months.  
45  
46  
47  
48  
49  
50  
51  
52  
53  
54  
55  
56  
57  
58  
59  
60

1  
2  
3 The total cost of treating cirrhotic patients in Catalonia in 2013 was almost €150  
4 million (€4,234 per patient). Hospitalization remains the main source of  
5 healthcare-related expenditure, followed by medication, although hospital  
6 mortality has decreased in recent years[16]. Patients with more advanced liver  
7 disease required more healthcare (more days hospitalized, emergency visits,  
8 and primary care visits - which include prescriptions-) and more medication,  
9 generating greater expenditures. In patients with cirrhosis, the probability of  
10 dying within a year of a hepatic decompensation is 34%[17]. In our study,  
11 mortality was nearly 2.3 times higher in patients with a recent decompensation  
12 than inpatients who had gone at least a year since a prior decompensation and  
13 4.5 times higher than those who had never had a decompensation.  
14  
15  
16  
17  
18  
19  
20  
21  
22  
23  
24  
25  
26  
27

28 This large database allowed us to calculate the morbidity burden using the  
29 GMA[18] and to stratify the risk of morbimortality. In our population, morbidities  
30 were common, and greater severity of liver disease was associated with higher  
31 morbidity burden (>75% of all patients were in moderate or higher risk strata:  
32 72.2% in the Compensated group, 90.3% in the Previous decompensation  
33 group, and 95.5% in the Recent decompensation group). Moreover,  
34 expenditures increased with increasing GMA strata, so controlling comorbidities  
35 is one way to reduce costs.  
36  
37  
38  
39  
40  
41  
42  
43  
44  
45

46 Another way to reduce costs is to modify the natural history of the liver disease.  
47 Studies that have analyzed the direct and indirect costs of treating hepatitis C  
48 infection point out that costs rise with the natural history of the disease  
49 [17,19,20]. New antiviral agents against hepatitis C have modified the natural  
50 history of the disease, but the impact of these agents on the overall cost of  
51  
52  
53  
54  
55  
56  
57  
58  
59  
60

1  
2  
3 treating patients with hepatitis C infection will not become clear until a few years  
4 have passed [21]. Nevertheless, our results suggest that this impact is likely to  
5 be significant because expenditures in patients with recent hepatic  
6 decompensation totaled more than twice those in patients who had not had a  
7 decompensation for at least one year and more than 3 times those in patients  
8 with a compensated cirrhosis.  
9  
10  
11  
12  
13  
14  
15

16  
17  
18 Although some studies have analyzed the costs caring for other diseases such  
19 as diabetes mellitus [22] or heart failure [18], to our knowledge, this is the first  
20 population-based study to analyze morbidity and costs in patients with liver  
21 disease in function of hepatic decompensation. Although several studies have  
22 evaluated some aspects involved in caring for cirrhotic patients (hospitalization,  
23 care giving hours [2], our study analyzed overall costs, including expenditures  
24 on skilled nursing facility, primary care, and mental health.  
25  
26  
27  
28  
29  
30  
31  
32  
33  
34

35 **Limitations:** The use of a general population database minimized selection  
36 bias and allowed us to analyze real world population. However, using  
37 administrative data to identify cirrhotic patients can lead to misdiagnosis.  
38 Moreover, this administrative database did not include important information  
39 such as the etiology of cirrhosis (although alcohol consumption and/or hepatitis  
40 C infection are recorded in the database) and other important clinical data for  
41 characterizing and understanding the study population and the evolution of the  
42 disease. Due to this, we can't calculate classical scores such as MELD, Child-  
43 Pugh or ACLF.  
44  
45  
46  
47  
48  
49  
50  
51  
52  
53  
54  
55  
56  
57  
58  
59  
60

1  
2  
3 Patients' need for social services increase when liver disease becomes  
4 decompensated; however, the costs associated with this increase are difficult to  
5 quantify and vary widely among health systems, so caution is warranted in  
6 interpreting these results.  
7  
8  
9  
10

## 11 12 13 14 15 **CONCLUSIONS**

16  
17  
18 Cirrhosis results in high healthcare resource utilization, leading to high  
19 expenditures. On December 31, 2012, the prevalence in Catalonia was 459.9  
20 per 100,000 inhabitants. The cost of treating cirrhotic patients was high  
21 because more than 75% had moderate to very high risk according to their GMA  
22 morbidity burden. The main expenditure was hospitalization; its weight in the  
23 total expenditure increased with decompensation.  
24  
25  
26  
27  
28  
29

30  
31  
32 Avoiding excessive alcohol consumption and eradicating hepatitis C infection  
33 with the new antiviral agents will probably modify the natural history of cirrhosis,  
34 reducing morbidity and mortality and consequently expenditures in these  
35 patients.  
36  
37  
38  
39  
40  
41  
42  
43  
44  
45

46 **Contributor ship statement:** All authors contribute in the concept and design , MC and  
47 EM acquisition of data and statistical analysis. MM, MV, MC and EM interpretation of data.  
48 MM and MV writing of the manuscript and all authors supervised and approved the  
49 manuscript.  
50  
51  
52  
53  
54  
55  
56  
57  
58  
59  
60

**Conflict of Interest:** None of the authors declare any conflict of interest.

**Funding:** The authors received no financial support.

**Data Sharing Statement:** Data are not included in this submission due to legal and privacy stipulations from the CatSalut (Catalan Health Department). Data are available to those completing the request for research identifiable files from the CatSalut upon acceptance by the Catalan Health Department. For contact, please reach the Analysis on Demand and Activity Division, Catalan Health Service

## REFERENCES

1. Adams LA, Lymp JF, St Sauver J, Sanderson SO, Lindor KD, Feldstein A, et al. The natural history of nonalcoholic fatty liver disease: a population-based cohort study. *Gastroenterology*. 2005 Jul;129(1):113–21.
2. Rakoski MO, McCammon RJ, Piette JD, Iwashyna TJ, Marrero JA, Lok AS, et al. Burden of cirrhosis on older Americans and their families: analysis of the health and retirement study. *Hepatology*. 2012 Jan;55(1):184–91.
3. Sayiner M, Koenig A, Henry L, Younossi ZM. Epidemiology of Nonalcoholic Fatty Liver Disease and Nonalcoholic Steatohepatitis in the United States and the Rest of the World. *Clin Liver Dis*. 2016 May;20(2):205–14.
4. Otgonsuren M, Henry L, Hunt S, Venkatesan C, Mishra A, Younossi ZM. Resource utilization and survival among Medicare patients with advanced liver disease. *Dig Dis Sci*. 2015 Feb;60(2):320–32.
5. Asrani SK, Kamath PS. Natural history of cirrhosis. *Curr Gastroenterol Rep*. 2013 Feb;15(2):308.
6. Jafri S-MR, Gordon SC. The consequences of cirrhosis in America. *Dig Dis Sci*. 2015 Feb;60(2):283–4.
7. García-Fulgueiras A, García-Pina R, Morant C, de Larrea-Baz NF, Alvarez E. Burden of disease related to hepatitis C and hepatitis B in Spain: a methodological challenge of an unfolding health problem. *J Viral Hepat*. 2011 Oct;18(10):e453-60.
8. Mathers C, Stein C, Ma Fat D, Al. E. Global Burden of disease 2000: version 2 methods and results. Global Programme on Evidence for Health Policy Discussion Paper No 50. Geneva. World Health Organization. 2002. <http://www.who.int/healthinfo/paper50.pdf>. 2002.
9. Chung W. The cost of liver disease in Korea: methodology, data, and evidence.

- 1  
2  
3 Clin Mol Hepatol. 2015 Mar;21(1):14–21.
- 4 10. Vitor S, Marinho RT, Gíria J, Velosa J. An observational study of the direct costs  
5 related to hospital admissions, mortality and premature death associated with  
6 liver disease in Portugal. BMC Res Notes. 2016 Jan;9(1):62.
- 7 11. Akbari Sari A, Kazemi Karyani A, Alavian SM, Arab M, Rostami  
8 Gholmohamadi F, Rezaei S. The Economic Burden of Liver Cirrhosis in Iran: a  
9 Cost of Illness Study. Iran J Public Health. 2015 Apr;44(4):512–21.
- 10 12. Charlson ME, Pompei P, Ales KL, MacKenzie CR. A new method of classifying  
11 prognostic comorbidity in longitudinal studies: development and validation. J  
12 Chronic Dis. 1987 Jan;40(5):373–83.
- 13 13. Deyo RA, Cherkin DC, Ciol MA. Adapting a clinical comorbidity index for use  
14 with ICD-9-CM administrative databases. J Clin Epidemiol. 1992 Jun;45(6):613–  
15 9.
- 16 14. Dueñas-Espín I, Vela E, Pauws S, Bescos C, Cano I, Cleries M, et al. Proposals  
17 for enhanced health risk assessment and stratification in an integrated care  
18 scenario. BMJ Open. 2016 Jan;6(4):e010301.
- 19 15. Hanley JA, McNeil BJ. The meaning and use of the area under a receiver  
20 operating characteristic (ROC) curve. Radiology. 1982 Apr;143(1):29–36.
- 21 16. Vergara M, Clèries M, Vela E, Bustins M, Miquel M, Campo R. Hospital  
22 mortality over time in patients with specific complications of cirrhosis. Liver Int.  
23 2013 Jul;33(6):828–33.
- 24 17. Gola A, Davis S, Greenslade L, Hopkins K, Low J, Marshall A, et al. Economic  
25 Analysis of Costs for Patients With End Stage Liver Disease Over the Last Year  
26 of Life. BMJ Support Palliat Care. 2015;5(1):110.2-110.
- 27 18. Stepanova M, De Avila L, Afendy M, Younossi I, Pham H, Cable R, et al. Direct  
28 and Indirect Economic Burden of Chronic Liver Disease in the United States.  
29 Clin Gastroenterol Hepatol. 2016 Jul 25;
- 30 19. Solà R, Alvarez MA, Ballesté B, Montoliu S, Rivera M, Miquel M, et al.  
31 Probability of liver cancer and survival in HCV-related or alcoholic-  
32 decompensated cirrhosis. A study of 377 patients. Liver Int. 2006 Feb;26(1):62–  
33 72.
- 34 20. Farré N, Vela E, Clèries M, Bustins M, Cainzos-Achirica M, Enjuanes C, et al.  
35 Medical resource use and expenditure in patients with chronic heart failure: a  
36 population-based analysis of 88 195 patients. Eur J Heart Fail. 2016 Apr 25;
- 37 21. Gray E, O’Leary A, Kieran JA, Fogarty E, Dowling T, Norris S. Direct costs of  
38 interferon-based and interferon-free direct-acting antiviral regimens for the  
39 treatment of chronic hepatitis C infection. J Viral Hepat. 2016 Mar 21;
- 40 22. Martin NK, Vickerman P, Dore GJ, Grebely J, Miners A, Cairns J, et al.  
41 Prioritization of HCV treatment in the direct-acting antiviral era: An economic  
42 evaluation. J Hepatol. 2016 Feb 8;
- 43 23. Manos MM, Darbinian J, Rubin J, Ray GT, Shvachko V, Denis B, et al. The  
44 effect of hepatitis C treatment response on medical costs: a longitudinal analysis  
45 in an integrated care setting. J Manag Care Pharm. Jan;19(6):438–47.
- 46 24. Economic Costs of Diabetes in the U.S. in 2007. Diabetes Care. 2008 Feb  
47 27;31(3):596–615.
- 48  
49  
50  
51  
52  
53  
54  
55  
56  
57  
58  
59  
60

1  
2  
3  
4  
5  
6  
7  
8  
9  
10  
11  
12  
13  
14  
15  
16  
17  
18  
19  
20  
21  
22  
23  
24  
25  
26  
27  
28  
29  
30  
31  
32  
33  
34  
35  
36  
37  
38  
39  
40  
41  
42  
43  
44  
45  
46  
47  
48  
49  
50  
51  
52  
53  
54  
55  
56  
57  
58  
59  
60

TABLE AND FIGURE LEGENDS:

Table 1: Demographic characteristics according to liver disease group

Table 2: Health services utilization in 2013 in function of liver disease group

Table 3: Multivariable logistic regression analyzing factors associated with expenditure higher than the 85th percentile

Figure 1: Health expenditure by type of resource in the general population and in cirrhotic patients, in millions of euros. The category “Other” includes mental health services, non-urgent medical transportation, outpatient rehabilitation, and homeoxygen therapy.

Figure 2: Healthcare resource use in cirrhotic patients by age.

Figure 3: Healthcare resource use in cirrhotic patients by hepatic decompensation.

Figure 4: Healthcare resource use in cirrhotic patients by risk stratification (morbidity burden).

**Supplement information**

Appendix 1: Hepatic decompensation codes

Table 1S: Mean price by activity

Table 2S: Demographic characteristics in function of specific hepatic decompensation during 2012



1  
2  
3  
4  
5  
6  
7  
8  
9  
10  
11  
12  
13  
14  
15  
16  
17  
18  
19  
20  
21  
22  
23  
24  
25  
26  
27  
28  
29  
30  
31  
32  
33  
34  
35  
36  
37  
38  
39  
40  
41  
42  
43  
44  
45  
46  
47  
48  
49  
50  
51  
52  
53  
54  
55  
56  
57  
58  
59  
60

Table 3S: Health services utilization by specific hepatic decompensation during 2012

For peer review only

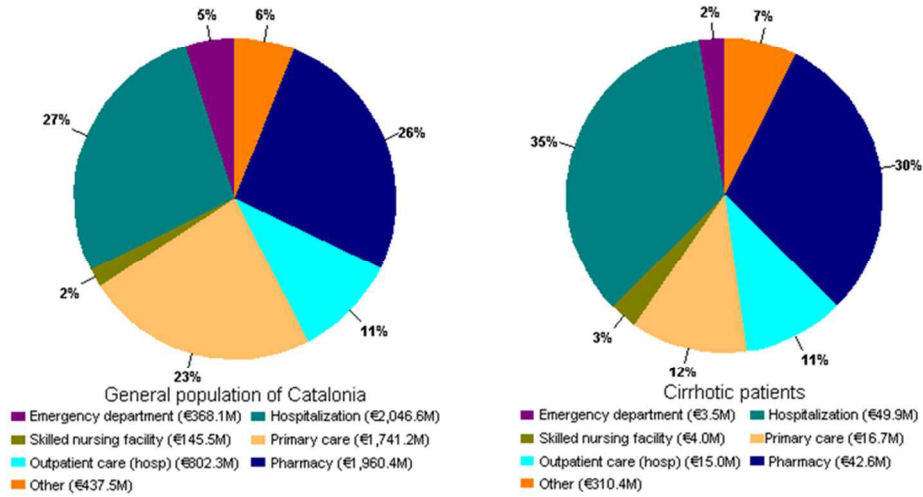

Health expenditure by type of resource in the general population and in cirrhotic patients, in millions of Euros. The category "Other" includes mental health services, non-urgent medical transportation, outpatient rehabilitation, and home oxygen therapy.

254x190mm (96 x 96 DPI)

view only

1  
2  
3  
4  
5  
6  
7  
8  
9  
10  
11  
12  
13  
14  
15  
16  
17  
18  
19  
20  
21  
22  
23  
24  
25  
26  
27  
28  
29  
30  
31  
32  
33  
34  
35  
36  
37  
38  
39  
40  
41  
42  
43  
44  
45  
46  
47  
48  
49  
50  
51  
52  
53  
54  
55  
56  
57  
58  
59  
60

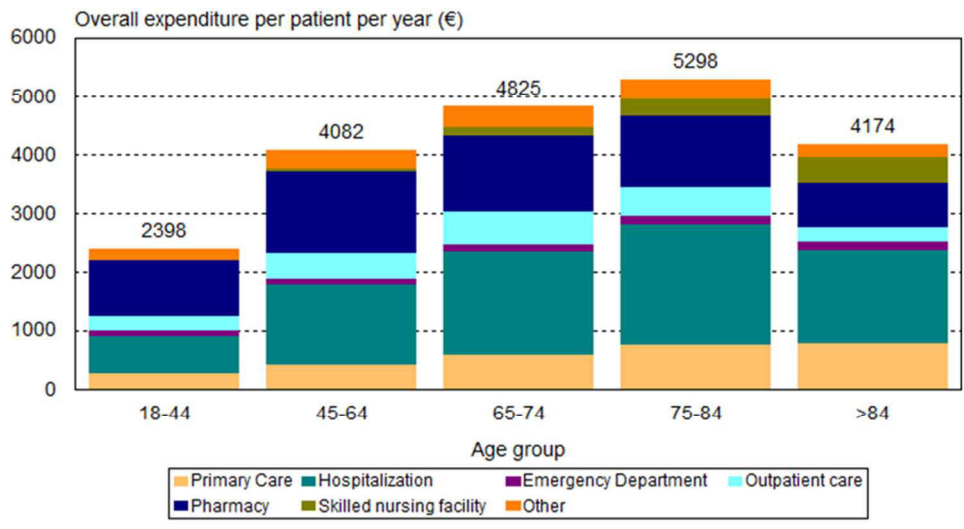

Healthcare resource use in cirrhotic patients by age.

254x190mm (96 x 96 DPI)

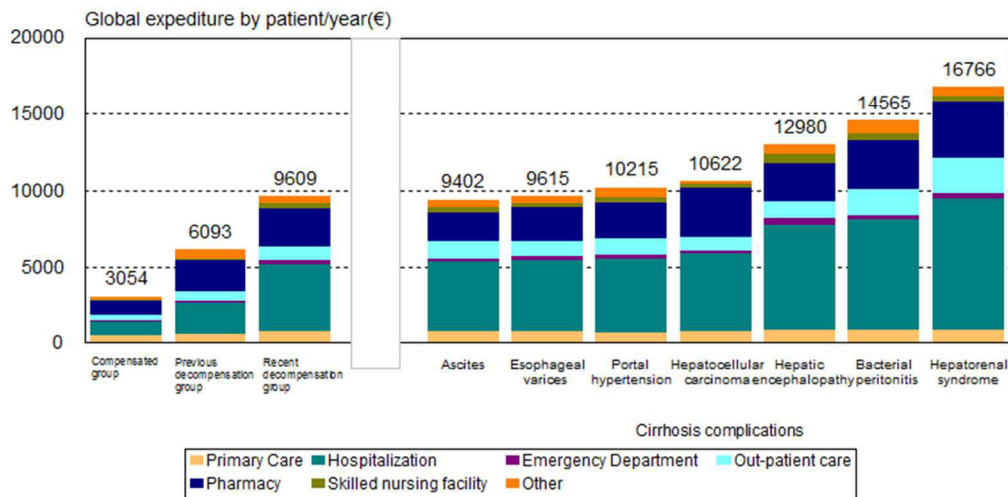

Healthcare resource use in cirrhotic patients by hepatic decompensation.

196x96mm (96 x 96 DPI)

1  
2  
3  
4  
5  
6  
7  
8  
9  
10  
11  
12  
13  
14  
15  
16  
17  
18  
19  
20  
21  
22  
23  
24  
25  
26  
27  
28  
29  
30  
31  
32  
33  
34  
35  
36  
37  
38  
39  
40  
41  
42  
43  
44  
45  
46  
47  
48  
49  
50  
51  
52  
53  
54  
55  
56  
57  
58  
59  
60

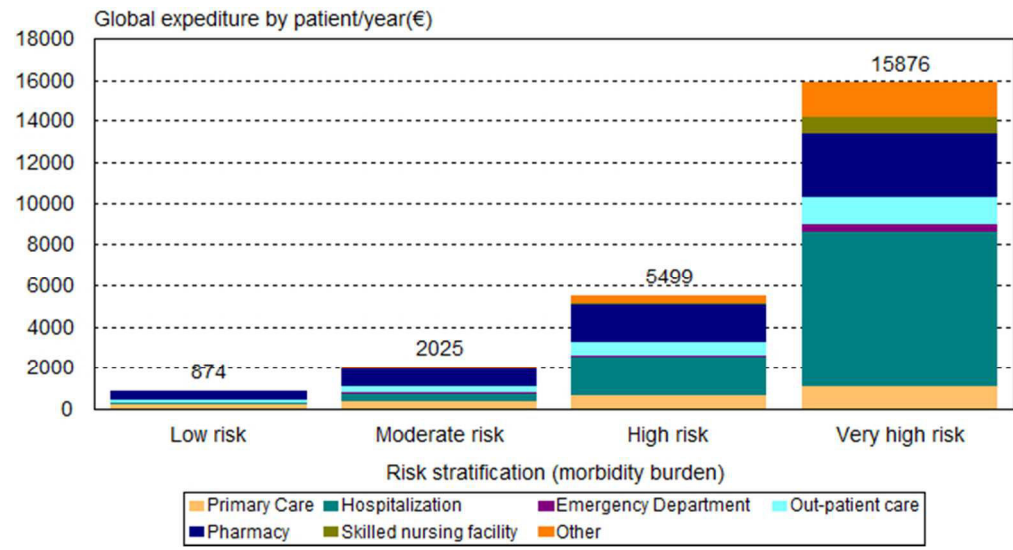

Healthcare resource use in cirrhotic patients by risk stratification (morbidity burden).

177x95mm (96 x 96 DPI)

review only

**Table 1:** Demographic characteristics according to liver disease group

|                                          | TOTAL     | Compensated group<br>No hepatic decompensation | Hepatic decompensation                                                           |                                                           |
|------------------------------------------|-----------|------------------------------------------------|----------------------------------------------------------------------------------|-----------------------------------------------------------|
|                                          |           |                                                | Previous decompensation group<br>Decompensation before 2012, but not during 2012 | Recent decompensation group<br>Decompensation during 2012 |
| Cases                                    | 34,740    | 25,299                                         | 5,393                                                                            | 4,048                                                     |
| Patients / year                          | 33,567    | 24,737                                         | 5,195                                                                            | 3,635                                                     |
| Age mean±SD (years) *                    | 61.2±13.9 | 60.6 ±14.4                                     | 62.2 ±12.6                                                                       | 63.7 ±12.7                                                |
| Women (%)                                | 41.7      | 44.8                                           | 33.8                                                                             | 33.4                                                      |
| <b>Morbidity</b>                         |           |                                                |                                                                                  |                                                           |
| Number of chronic comorbidities (mean) * | 5.1       | 4.7                                            | 6.0                                                                              | 6.5                                                       |
| Stratification group (AMG)*              |           |                                                |                                                                                  |                                                           |
| Very high-risk stratum (%)               | 11.6      | 7.8                                            | 17.0                                                                             | 27.8                                                      |
| High risk stratum (%)                    | 30.6      | 26.0                                           | 41.0                                                                             | 45.4                                                      |
| Moderate risk stratum (%)                | 35.2      | 38.4                                           | 32.3                                                                             | 22.3                                                      |
| Low risk stratum (%)                     | 22.2      | 27.8                                           | 9.7                                                                              | 4.5                                                       |
| Ischemic heart disease (%)*              | 12.1      | 10.6                                           | 15.3                                                                             | 17.4                                                      |
| Stroke (%)*                              | 6.1       | 5.4                                            | 7.7                                                                              | 8.5                                                       |
| Heart failure (%)*                       | 7.4       | 6.0                                            | 9.8                                                                              | 12.7                                                      |
| Diabetes (%)*                            | 28.7      | 25.0                                           | 37.9                                                                             | 39.7                                                      |
| Renal failure (%)*                       | 7.3       | 4.9                                            | 13.3                                                                             | 14.6                                                      |
| COPD (%)*                                | 15.8      | 12.7                                           | 20.1                                                                             | 21.3                                                      |
| Dementia (%)                             | 3.1       | 3.0                                            | 3.2                                                                              | 3.7                                                       |
| Depression (%)                           | 22.3      | 22.2                                           | 22.3                                                                             | 23.2                                                      |
| Malignancy (%)*                          | 19.0      | 13.5                                           | 27.9                                                                             | 41.3                                                      |

|                                                         |      |      |      |      |
|---------------------------------------------------------|------|------|------|------|
| Malnutrition (%)*                                       | 0.5  | 0.2  | 1.0  | 1.3  |
| Anemia (%)*                                             | 21.3 | 12.1 | 42.5 | 50.7 |
| HIV+ (%)*                                               | 2.6  | 1.7  | 5.1  | 5.0  |
| Hepatitis C virus + (%)*                                | 14.7 | 7.0  | 31.8 | 39.6 |
| Alcohol (%)*                                            | 28.1 | 17.5 | 57.6 | 55.8 |
| Drugs (%)*                                              | 4.2  | 3.0  | 7.5  | 7.5  |
| <b>Mortality and hepatic decompensation during 2013</b> |      |      |      |      |
| Mortality 2013 (%)*                                     | 6.7  | 4.3  | 8.5  | 19.4 |
| Hepatic decompensation 2013 (%)*                        | 11.7 | 2.7  | 21.3 | 54.8 |

AMG: Adjusted morbidity grouper; COPD: chronic obstructive pulmonary disease; HIV: human immunodeficiency virus.

\*  $p < 0.001$

**Table 2:** Health services utilization in 2013 in function of liver disease group

|                                                                     | Compensated group         | Hepatic decompensation                          |                             |
|---------------------------------------------------------------------|---------------------------|-------------------------------------------------|-----------------------------|
|                                                                     |                           | Previous decompensation group                   | Recent decompensation group |
|                                                                     | No hepatic decompensation | Decompensation before 2012, but not during 2012 | Decompensation during 2012  |
| Cases                                                               | 25,299                    | 5,393                                           | 4,048                       |
| Admission rate (x100)*                                              | 29.2                      | 60.8                                            | 117.9                       |
| Mean length of hospitalization (days)*                              | 1.8                       | 4.5                                             | 9.6                         |
| Unplanned admission rate (x100)*                                    | 16.5                      | 37.8                                            | 78.3                        |
| Patients with unplanned admission (%)*                              | 10.8                      | 22.9                                            | 40.3                        |
| Patients >1 unplanned admission (%)*                                | 3.4                       | 8.4                                             | 18.5                        |
| Emergency visit rates (x100)*                                       | 71.2                      | 111.1                                           | 186.8                       |
| Patients with emergency visit (%)*                                  | 33.8                      | 45.5                                            | 61.4                        |
| Patients with >1 emergency visits (%)*                              | 15.7                      | 25.7                                            | 38.8                        |
| Gastroenterology/hepatology specialist outpatient visits (average)* | 0.6                       | 1.8                                             | 2.6                         |
| Other hospital outpatient visits (average)                          | 3.1                       | 4.3                                             | 4.8                         |
| Primary care visits (average)*                                      | 11.8                      | 13.4                                            | 16.5                        |
| Users of a skilled nursing facility (%)*                            | 4.0                       | 7.3                                             | 15.7                        |
| Mental health outpatient visits rate (x100)                         | 16.6                      | 13.5                                            | 15.1                        |
| Psychiatric hospital admission rate (x100)                          | .6                        | .7                                              | 1.6                         |

\* p&lt; 0.001



**Table 3:** Multivariable logistic regression analyzing factors associated with expenditure higher than the 85th percentile

|                                                | n      | $\beta$<br>coefficient | OR      | 95% CI  |         |
|------------------------------------------------|--------|------------------------|---------|---------|---------|
| <b>Sex</b>                                     |        |                        |         |         |         |
| Male                                           | 18,783 |                        | 1       | --      | --      |
| Female                                         | 13,631 | -0.034                 | 0.967   | 0.890   | 1.050   |
| <b>Age group</b>                               |        |                        |         |         |         |
| 18-44 years old                                | 4,152  |                        | 1       | --      | --      |
| 45-64 years old                                | 15,027 | 0.037                  | 1.037   | 0.881   | 1.222   |
| 65-74 years old                                | 7,540  | -0.154                 | 0.858   | 0.720   | 1.022   |
| 75-84 years old                                | 4,750  | -0.515                 | 0.597   | 0.496   | 0.720   |
| >84 years old                                  | 945    | -1.209                 | 0.299   | 0.225   | 0.396   |
| <b>Hepatic decompensation</b>                  |        |                        |         |         |         |
| Compensated group                              | 24,219 |                        | 1       | --      | --      |
| Previous decompensation group                  | 4,934  | 0.311                  | 1.364   | 1.230   | 1.514   |
| Recent decompensation group                    | 3,261  | 0.687                  | 1.988   | 1.770   | 2.234   |
| <b>Risk stratum (morbidity burden)</b>         |        |                        |         |         |         |
| Low risk stratum                               | 7,694  |                        | 1       | --      | --      |
| Moderate risk stratum                          | 12,202 | 1.126                  | 3.082   | 2.454   | 3.870   |
| High risk stratum                              | 9,758  | 2.769                  | 15.944  | 12.780  | 19.891  |
| Very high risk stratum                         | 2,760  | 4.850                  | 127.704 | 100.533 | 162.218 |
| Chronic kidney disease                         | 2,075  | 0.113                  | 1.120   | 0.988   | 1.269   |
| Hepatitis C virus +                            | 4,377  | 0.429                  | 1.536   | 1.389   | 1.699   |
| HIV+                                           | 823    | 2.930                  | 18.734  | 15.374  | 22.828  |
| <b>Unplanned hospitalization during 2012</b>   |        |                        |         |         |         |
| 0                                              | 27,687 |                        | 1       | --      | --      |
| 1                                              | 3,208  | 0.117                  | 1.124   | 0.992   | 1.274   |
| 2                                              | 944    | 0.168                  | 1.183   | 0.974   | 1.437   |
| 3                                              | 326    | 0.461                  | 1.586   | 1.176   | 2.139   |
| >3                                             | 249    | 0.507                  | 1.660   | 1.166   | 2.363   |
| <b>Emergency department visits during 2012</b> |        |                        |         |         |         |
| 0                                              | 20,034 |                        | 1       | --      | --      |
| 1-2                                            | 8,919  | 0.190                  | 1.209   | 1.095   | 1.334   |
| 3-5                                            | 2,648  | 0.415                  | 1.514   | 1.314   | 1.743   |
| >5                                             | 813    | 0.580                  | 1.785   | 1.431   | 2.226   |
| Skilled nursing facility during 2012           | 820    | -0.339                 | 0.713   | 0.587   | 0.865   |
| Constant                                       |        | -4.593                 | 0.010   | --      | --      |

1  
2  
3 **OR:** Odds Ratio. **CI:** Confidence Interval. **HIV:** Human immunodeficiency virus  
4  
5  
6  
7  
8  
9  
10  
11  
12  
13  
14  
15  
16  
17  
18  
19  
20  
21  
22  
23  
24  
25  
26  
27  
28  
29  
30  
31  
32  
33  
34  
35  
36  
37  
38  
39  
40  
41  
42  
43  
44  
45  
46  
47  
48  
49  
50  
51  
52  
53  
54  
55  
56  
57  
58  
59  
60

For peer review only

## SUPPLEMENTARY MATERIAL:

## Appendix 1: Hepatic decompensation codes:

- Encephalopathy: 572.2, 070.2, 070.4, 070.6, 070.71
- Portal hypertension: 572.3
- Hepatorenal syndrome: 572.4
- Spontaneous bacterial peritonitis: 032.83, 567.xx, 569.5
- Hepatocellular carcinoma: 155.0, 155.2, 197.7
- Ascites: 789.5
- Esophageal varices with or without bleeding: 456.0, 456.1, 456.2x

Table 1S: Mean price by activity

|                          |                          |
|--------------------------|--------------------------|
| Primary care visits      |                          |
| Physician                | € 38.04 per visit        |
| Home visit (physician)   | € 45.65 per visit        |
| Nurse                    | € 22.83 per visit        |
| Home visit (nurse)       | € 27.39 per visit        |
| Specialist visit         | € 58.46 per visit        |
| Mental health visit      | € 75.31 per visit        |
| Emergency room visit     | € 106.38 per visit       |
| Hospital admission       | € 2,150.64 per admission |
| Skilled nursing facility |                          |
| Long term                | € 50.22 per day          |
| Convalescence            | € 86.91 per day          |

|                                   |                        |
|-----------------------------------|------------------------|
| Mental health admission           |                        |
| Acute                             | € 183.31 per day       |
| Sub-acute                         | € 115.35 per day       |
| Minor outpatient surgery          | € 156.84 per surgery   |
| Outpatient Care Clinics           | € 169.35 per day       |
| Hospital at home                  | € 950.00 per admission |
| Outpatient rehabilitation         | € 213.39 per session   |
| Non-urgent medical transportation | € 61.34 per act        |
| Home oxygen therapy               | € 49.12 per session    |
| Dialysis                          | € 151.20 per session   |

Table 2S: Demographic characteristics in function of specific hepatic decompensation during 2012

|                                  | TOTAL      | Specific hepatic decompensation during 2012 |            |            |            |            |            |            |
|----------------------------------|------------|---------------------------------------------|------------|------------|------------|------------|------------|------------|
|                                  |            | EV                                          | HE         | SBP        | HRS        | CHC        | ASC        | PHT        |
| Cases                            | 4,048      | 1800                                        | 815        | 293        | 68         | 1006       | 786        | 187        |
| Patients / year                  | 3,635      | 1613                                        | 664        | 252        | 49         | 852        | 689        | 169        |
| Age* (mean±SD) (years)           | 63.7 ±12.7 | 62.6 ±12.6                                  | 63.4 ±12.3 | 62.2 ±12.5 | 61.8 ±12.8 | 68.3 ±10.7 | 62.1 ±12.3 | 61.8 ±12.3 |
| Women (%)                        | 33.4       | 31.3                                        | 36.0       | 30.7       | 33.8       | 27.7       | 34.6       | 32.9       |
| <b>Morbidity</b>                 |            |                                             |            |            |            |            |            |            |
| Number of chronic co-morbidities |            | 6.5                                         | 7.1        | 6.8        | 7.5        | 7.3        | 6.0        | 6.5        |
| Stratification groups (AMG)      |            |                                             |            |            |            |            |            |            |
| Very high-risk stratum           |            | 27.9                                        | 40.9       | 36.9       | 44.1       | 28.0       | 26.8       | 29.1       |
| High risk stratum                |            | 45.5                                        | 42.8       | 43.3       | 45.6       | 56.2       | 40.5       | 44.3       |
| Moderate risk stratum            |            | 23.2                                        | 14.1       | 16.4       | 10.3       | 15.5       | 23.8       | 22.8       |
| Low risk stratum                 |            | 3.4                                         | 2.2        | 3.4        | 0.0        | 0.3        | 8.9        | 4.0        |

**EV:** Esophageal Varices; **HE:** Encephalopathy; **SBP:** Spontaneous bacterial peritonitis; **HRS:** Hepatorenal syndrome; **CHC:** Hepatocellular Carcinoma; **ASC:** Ascites. **PHT:** Portal Hypertension; **AMG:** Adjusted Morbidity Groups.

Table 3S: Health services utilization by specific hepatic decompensation during 2012

|                                                                 | Specific Hepatic decompensation during 2012 |       |       |       |       |       |       |
|-----------------------------------------------------------------|---------------------------------------------|-------|-------|-------|-------|-------|-------|
|                                                                 | EV                                          | HE    | SBP   | HRS   | CHC   | ASC   | PHT   |
| Cases                                                           | 1800                                        | 815   | 293   | 68    | 1.006 | 786   | 1878  |
| Admission rate (x100)                                           | 128.1                                       | 175.1 | 175.1 | 170.6 | 115.0 | 125.1 | 128.5 |
| Average length of hospitalization (days)                        | 10.8                                        | 15.1  | 17.7  | 13.6  | 7.3   | 10.6  | 10.9  |
| Unplanned admission rate (x100)                                 | 87.8                                        | 131.0 | 112.6 | 97.1  | 58.7  | 88.5  | 87.0  |
| Patients with unplanned admission (%)                           | 42.2                                        | 55.1  | 51.2  | 52.9  | 35.6  | 45.0  | 43.3  |
| Patients >1 unplanned admission (%)                             | 20.7                                        | 30.8  | 28.3  | 23.5  | 13.5  | 21.0  | 20.9  |
| Emergency visit rates (x100)                                    | 208.8                                       | 277.3 | 245.1 | 222.1 | 141.7 | 199.6 | 211.2 |
| Patients with emergency visit (%)                               | 63.7                                        | 70.1  | 69.3  | 63.2  | 57.0  | 61.5  | 65.0  |
| Patients with >1 emergency visits (%)                           | 40.9                                        | 48.5  | 50.2  | 36.8  | 33.9  | 40.7  | 41.8  |
| Gastroenterology/hepatology specialist outpatient visits (mean) | 2.6                                         | 2.6   | 2.7   | 3.3   | 3.4   | 2.5   | 2.5   |
| Other hospital outpatient visits (average)                      | 4.6                                         | 4.2   | 6.0   | 3.8   | 4.5   | 4.6   | 5.2   |
| Primary Care visits (average)                                   | 16.3                                        | 17.9  | 18.4  | 16.3  | 15.6  | 17.7  | 16.1  |
| Users of a skilled nursing facility (%)                         | 14.8                                        | 24.5  | 17.7  | 30.9  | 21.2  | 16.4  | 14.7  |
| Mental Health outpatient visits rate (x100)                     | 15.8                                        | 18.9  | 10.9  | 23.5  | 4.6   | 18.2  | 15.4  |
| Psychiatric hospital admission rate (x100)                      | 2.1                                         | 1.1   | .7    | 2.9   | .3    | 1.8   | 2.6   |

**EV:** Esophageal Varices; **HE:** Encephalopathy; **SBP:** Spontaneous bacterial peritonitis; **HRS:** Hepatorenal syndrome; **CHC:** Hepatocellular Carcinoma; **ASC:** Ascites. **PHT:** Portal Hypertension;

# BMJ Open

## ECONOMIC BURDEN OF CIRRHOSIS IN CATALONIA:A POPULATION- BASED ANALYSIS

|                                 |                                                                                                                                                                                                                                                                                                                                                                                                                                                                                                                                                                                                                                                             |
|---------------------------------|-------------------------------------------------------------------------------------------------------------------------------------------------------------------------------------------------------------------------------------------------------------------------------------------------------------------------------------------------------------------------------------------------------------------------------------------------------------------------------------------------------------------------------------------------------------------------------------------------------------------------------------------------------------|
| Journal:                        | <i>BMJ Open</i>                                                                                                                                                                                                                                                                                                                                                                                                                                                                                                                                                                                                                                             |
| Manuscript ID                   | bmjopen-2017-018012.R1                                                                                                                                                                                                                                                                                                                                                                                                                                                                                                                                                                                                                                      |
| Article Type:                   | Research                                                                                                                                                                                                                                                                                                                                                                                                                                                                                                                                                                                                                                                    |
| Date Submitted by the Author:   | 27-Oct-2017                                                                                                                                                                                                                                                                                                                                                                                                                                                                                                                                                                                                                                                 |
| Complete List of Authors:       | Miquel, Mireia; Parc Tauli Hospital Universitari. Institut d'Investigació i Innovació Parc Taulí I3PT. Universitat Autònoma de Barcelona, Hepatology Unit, Digestive Disease Department; Instituto de Salud Carlos III, CIBERHED<br>Cleries, Montserrat ; Servei Català de la Salut, Generalitat de Catalunya, Unitat d'informació i Coneixement<br>Vergara, Mercedes; Parc Tauli Hospital Universitari. Institut d'Investigació i Innovació Parc Taulí I3PT. Universitat Autònoma de Barcelona, Hepatology Unit, Digestive Disease Department; Instituto de Salud Carlos III, CIBEREHD<br>Vela, Emili; Servei Català de la Salut, Generalitat de Catalunya |
| <b>Primary Subject Heading</b>: | Gastroenterology and hepatology                                                                                                                                                                                                                                                                                                                                                                                                                                                                                                                                                                                                                             |
| Secondary Subject Heading:      | Health economics, Health informatics                                                                                                                                                                                                                                                                                                                                                                                                                                                                                                                                                                                                                        |
| Keywords:                       | cirrhosis, economic expenditures, population study, adjusted morbidity groups                                                                                                                                                                                                                                                                                                                                                                                                                                                                                                                                                                               |
|                                 |                                                                                                                                                                                                                                                                                                                                                                                                                                                                                                                                                                                                                                                             |

SCHOLARONE™  
Manuscripts

## **ECONOMIC BURDEN OF CIRRHOSIS IN CATALONIA: A POPULATION-BASED ANALYSIS**

Mireia Miquel (1,2), Montserrat Clèries (3), Mercedes Vergara (1,2), Emili

Vela (3)

(1) Hepatology unit, Digestive Disease Department, Parc Taulí Hospital Universitari, Institut d'Investigació i Innovació Parc Taulí I3PT, Universitat Autònoma de Barcelona; Sabadell, Spain. (2) CIBERhed, Instituto Carlos III. Madrid, Spain. (3) Unitat d'informació i Coneixement, Servei Català de la Salut, Generalitat de Catalunya. Barcelona, Spain.

### **CORRESPONDING AUTHOR:**

Mireia Miquel

H.U. ParcTauli

ParcTauli s/n

08206 Sabadell,

email: mmiquel@tauli.cat

Telephone: +34 93 745 83 56

Fax :+34 93 745 82 42

**Electronic word count for main body of manuscript:** 5270 words without tables.

Number of tables and figures: 3 tables and 4 figures.

**Keywords:** Economic expenditures, cirrhosis, population study, Adjusted Morbidity Groups



1  
2  
3  
4  
5  
6  
7  
8  
9 **List of Abbreviations:**

10  
11  
12  
13 ICD-9CM: Clinical Modification of the International Classification of Diseases,

14  
15 9th Revision codes

16  
17 DRG: Diagnosis-related group

18  
19 AMG: Adjusted morbidity groups

20  
21 ANOVA: Analysis of variance

22  
23 CI: confidence interval  
24  
25  
26  
27  
28  
29  
30  
31  
32  
33  
34  
35  
36  
37  
38  
39  
40  
41  
42  
43  
44  
45  
46  
47  
48  
49  
50  
51  
52  
53  
54  
55  
56  
57  
58  
59  
60

## ABSTRACT

**Background:** Cirrhosis is a chronic disease with high morbidity and mortality.

Few studies have evaluated healthcare resource use in patients with cirrhosis.

**Objective:** We aimed to describe the point prevalence of cirrhosis on December 31, 2012 and the population-level distribution of healthcare resource use and expenditures in a non-selected population of cirrhotic patients stratified by whether their disease was compensated or decompensated and by comorbidity burden.

**Methods:** This population study included all known patients aged >18 years with cirrhosis (according to ICD-9) in Catalonia, Spain, on December 31, 2012. We evaluated healthcare resource use and expenditure during 2013, taking into account the presence of decompensation before or during 2012.

**Results:** We documented 34,740 patients diagnosed with cirrhosis (58.7% men; mean age 61.8±14 years), yielding a point prevalence on December 31, 2012 of 460 per 100,000 inhabitants. Annual mortality was 9.1%. During 2013, healthcare expenditures on cirrhotic patients totaled €142.1 million (€4,234 per patient), representing 1.8% of the total 2013 healthcare budget of Catalonia. Hospitalization costs accounted for 35.1% of the total expenditure, and outpatient care accounted for 22.4%. Multivariable logistic regression identified morbidity burden, HIV infection, hospitalization, and emergency room visits during 2012 as independent predictors of expenditure > 85th percentile (area under the receiver operating curve, 0.88 (95%CI:0.883–0.893; P<0.001).

1  
2  
3 **Conclusions:** Cirrhosis accounts for a high proportion of healthcare resource  
4 usage and expenditures; hospitalization accounted for the greatest  
5 expenditures.  
6  
7

8  
9 **electronic count: 230**  
10

### 11 12 13 14 15 16 **Strengths and limitations of this study:**

- 17  
18 • We perform a cost analysis using a population-based database including  
19 34,740 patients diagnosed with cirrhosis in Catalonia, thus minimizing  
20 selection bias.  
21  
22
- 23  
24 • The study quantified the total economic impact of cirrhosis in relation to  
25 the hepatic decompensation and determined the distribution of the costs  
26 involved in treating patients with this condition.  
27  
28
- 29  
30 • We have not included important information such as the etiology of  
31 cirrhosis and other important clinical data for characterizing the study  
32 population and the evolution of the disease (i.e. MELD, Child-Pugh or  
33 ACLF).  
34  
35
- 36  
37 • Using a validated risk assessment tool allowed us to calculate  
38 individuals' morbidity burden and to analyze the impact of multimorbidity  
39 on resource use and costs.  
40  
41
- 42  
43 • Although the database is periodically monitored and has high quality  
44 data, using administrative data to identify cirrhotic patients can lead to  
45 misclassification.  
46  
47  
48  
49  
50  
51  
52  
53  
54  
55  
56  
57  
58  
59  
60

**INTRODUCTION:**

Cirrhosis is a late stage in progressive liver disease of varying etiologies. The prevalence of cirrhosis among older adults is not well known, but is expected to increase, in part due to the rising incidence of nonalcoholic fatty liver disease and the aging of the hepatitis C population[1–3]. In fact, there is an increasing trend in the diagnosis of chronic liver disease and its decompensation and complications (including hepatocellular carcinoma)[4].

The interval between the compensated phase of cirrhosis and the development of complications (decompensated cirrhosis) is often long, with a reported median survival of 12 years[5,6]. Compared to age-matched patients without cirrhosis, patients with cirrhosis have worse health and more comorbid conditions, resulting in greater use of healthcare services, including more hospital visits, nursing home stays, and physician visits [2].

Chronic hepatitis C virus infection is one of the main causes of cirrhosis, and it is the most common indication for liver transplantation in Spain and worldwide[7,8]. Hepatitis C infection not only affects the liver, but is also associated with hypertension and other cardiovascular diseases, chronic renal impairment, and diabetes mellitus. Some studies have estimated the costs of hepatitis C infection without, however, analyzing the impact of complications of advanced liver disease [4].

Knowing the impact of decompensated disease on outcomes and on the cost of treating advanced liver disease is important for planning resource allocation and preventive strategies, especially in a public health system[8]. Because of its

1  
2  
3 importance in public health, a growing number of publications address chronic  
4  
5 liver disease [2,8–11].  
6

7 This study aimed to describe overall healthcare resource use and expenditures  
8  
9 in a non-selected population of cirrhotic patients stratified into those with  
10  
11 compensated disease and those with decompensated disease.  
12  
13

## 14 15 16 17 **MATERIALS AND METHODS**

### 18 19 **Data Source and Study Design**

20  
21 We analyzed healthcare resource use and expenditures in 2013 in patients with  
22  
23 cirrhosis residing in Catalonia, an autonomous region in Northeast Spain with  
24  
25 7,553,650 inhabitants (density, 232.8 inhabitants/km<sup>2</sup>). The regional health  
26  
27 department, named CatSalut, provides universal healthcare coverage to all  
28  
29 residents and collects detailed information on healthcare usage, including  
30  
31 information from the minimum basic dataset registered by healthcare units (e.g.,  
32  
33 hospitals, primary care centers, nursing facilities, and mental health centers).  
34  
35 CatSalut also collects information on drug prescription and billing for services  
36  
37 (e.g., outpatient visits to specialists, emergency department visits, non-urgent  
38  
39 medical transportation, outpatient rehabilitation, home oxygen therapy, and  
40  
41 dialysis). Initially, the Catalan health administration deployed a series of  
42  
43 registers to record healthcare units' activity. In 2011, the Catalan Health  
44  
45 Surveillance System (CHSS) was created to integrate most of those activity  
46  
47 registers, placing the patient (instead of the provider) in the center of this  
48  
49 information system, thus favoring longitudinal analysis and providing a more  
50  
51 holistic and transversal view of health problems. The CHSS includes all the  
52  
53  
54  
55  
56  
57  
58  
59  
60

1  
2  
3 diagnoses reported by the different providers, regardless of whether they were  
4 recorded as the primary or secondary diagnosis. This information system  
5 collects all information from the entire public health system, including all hospital  
6 admissions and healthcare visits. The CHSS contains 529 million diagnoses,  
7 440 million contacts with the various public health services, and 519 million  
8 prescriptions dispensed by pharmacies. Its automated data validation system  
9 checks the consistency of the data and identifies potential errors. Moreover, as  
10 this information is used for healthcare provider payment purposes, periodic  
11 external audits are carried out to ensure the quality and reliability of the data.  
12  
13

14  
15 Information from private health centers was not available for analysis, because  
16 although private hospitals notify CatSalut of their activity, they do not associate  
17 the reported data with each patient's identification number. Therefore, CatSalut  
18 has information about the activity performed, but not for individual patients.  
19  
20 CatSalut administrative data showed that in 2013, of 2,878 unplanned  
21 hospitalizations of cirrhotic patients, 2,727 (94.8%) took place in public hospitals  
22 and only 151 (5.2%) in private hospitals.  
23  
24  
25  
26  
27  
28  
29  
30  
31  
32  
33  
34  
35  
36  
37  
38  
39  
40  
41

### 42 **Selection of Patients**

43  
44 This retrospective fixed cohort study included all residents of Catalonia aged 18  
45 years or older diagnosed with cirrhosis on or before 31 December 2012 who  
46 were alive on that date. The International Classification of Diseases, 9th  
47 Revision, Clinical Modification (ICD-9CM) codes were used to identify cases  
48 with cirrhosis (Codes: 571.2 and 571.5) (see Suppinfo.Appendix1) as well as  
49 complications of cirrhosis.  
50  
51  
52  
53  
54  
55  
56  
57  
58  
59  
60

1  
2  
3 We defined hepatic decompensation as an unscheduled hospital admission for  
4 hepatic encephalopathy, ascites, spontaneous bacterial peritonitis, hepatorenal  
5 syndrome, or hepatic complications such as hepatocellular carcinoma,  
6  
7 esophageal varices, or portal hypertension. We divided patients into three  
8  
9 groups:  
10  
11

- 12  
13 • Compensated group: cirrhotic patients who had not had any episodes of hepatic  
14 decompensation before 2013,  
15
- 16  
17 • Previous decompensation group: patients who had had at least one episode of  
18 hepatic decompensation before 2012 but none during 2012,  
19
- 20  
21 • Recent decompensation group: patients who had at least one episode of  
22 hepatic decompensation during 2012.  
23  
24  
25  
26  
27

### 28 29 **Calculation of Expenditure**

30  
31 The primary outcome variable of the study was expenditures related to  
32 healthcare resource use in 2013. In Catalonia, expenditures for healthcare and  
33 pharmacy services are normally directly attributed to each patient through their  
34 personal health identification number. Expenditures for primary care are  
35 calculated indirectly from a standard price per visit weighted by attending  
36 professional (physician or nurse) and site of assistance. Expenditures for  
37 hospital care are weighted by diagnosis-related groups (DRG). Expenditures for  
38 in-patient care at hospitals, skilled nursing facilities, and mental health centers  
39 are calculated according to length of stay (supplement info: Table 1S shows the  
40 average price by activity in Catalonia). The costs are attributed to each person  
41 through their personal identification codes assigned by the public health  
42 system.  
43  
44  
45  
46  
47  
48  
49  
50  
51  
52  
53  
54  
55  
56  
57  
58  
59  
60

1  
2  
3 The prices used in the calculations are the rates that CatSalut pays healthcare  
4 providers, which are published annually in the Official Gazette of the  
5 Government of Catalonia.  
6  
7

8  
9 CatSalut's budget for 2013 was €8,085 million, of which €7,885 million (97.5%)  
10 was devoted to healthcare services. Emergency medical transport and  
11 screening for breast and colon cancer accounted for the largest proportion of  
12 expenditures that were not individually allocated. The healthcare services in  
13 CatSalut's morbidity database accounted for €7,502 million (€968 per capita),  
14 which represents 95.1% of CatSalut's expenditure on health services.  
15  
16  
17

18  
19 In this population-based study, the methods used allowed us to analyze the  
20 expenditures on patients with cirrhosis, but not the costs attributable only to the  
21 disease itself. Thus, we calculated the total healthcare expenditure per person  
22 per year (in euros) for patients with cirrhosis (including cirrhosis-related care  
23 and care related to comorbidities), rather than the expenditure specifically  
24 associated with cirrhosis care. This approach enabled a comprehensive  
25 analysis of healthcare expenditures in this group of complex patients. To  
26 account for shorter follow-up periods due to deaths, time at risk was calculated  
27 in days from 31 December 2012 to the date of death (or 365 days otherwise)  
28 and transformed to years. Thus, the unit of analysis is not the patient but rather  
29 the patient/year.  
30  
31  
32  
33  
34  
35  
36  
37  
38  
39  
40  
41  
42  
43  
44  
45  
46  
47

#### 48 **Assessment of predictors of increased expenditure**

49  
50 We also sought to identify independent predictors associated with yearly  
51 expenditures greater than or equal to the 85th percentile of the distribution in  
52 the study population. This analysis included only patients who survived the  
53  
54  
55  
56  
57  
58  
59  
60



1  
2  
3 whole study period (n=32,414). Predictors assessed were age, sex,  
4 comorbidities included in the Charlson Index[12,13], previous healthcare  
5 utilization, and a novel population-based health risk assessment tool deployed  
6 in Catalonia, the Adjusted Morbidity Grouper (AMG), which is used to calculate  
7 an individual's morbidity burden [14]. The AMG categorizes each patient in a  
8 risk stratification pyramid with five strata:  
9  
10  
11  
12  
13  
14

- 15 • Basal risk stratum: comprising individuals with minimum morbidity burden; 50%  
16 of individuals in the overall population of Catalonia (but 0% of cirrhotic patients)  
17 fall into this stratum.  
18  
19
- 20 • Low risk stratum: comprising individuals with low level complexity; 30% of  
21 individuals in the overall population of Catalonia (but 22.2% of cirrhotic patients)  
22 fall into this stratum.  
23  
24
- 25 • Moderate risk stratum: comprising individuals with higher complexity than the  
26 previous risk stratum; 15% of individuals in the overall population of Catalonia  
27 (but 35.6% of cirrhotic patients) fall into this stratum.  
28  
29
- 30 • High risk stratum: comprising individuals with a greater morbidity burden than  
31 the previous stratum; 4% of individuals in the overall population of Catalonia  
32 (but 30.6% of cirrhotic patients) fall into this stratum.  
33  
34
- 35 • Very high-risk stratum: comprising individuals with the highest morbidity burden;  
36 1% of individuals in the overall population of Catalonia (but 11.6% of cirrhotic  
37 patients) fall into this stratum.  
38  
39  
40  
41  
42  
43  
44  
45  
46  
47  
48  
49

### 50 **Statistical analysis**

51  
52 Continuous variables are reported as means±standard deviations. For the  
53 univariate analysis, we used chi-square tests to compare **54 categorical** variables  
55  
56  
57  
58  
59  
60

1  
2  
3 and analysis of variance (ANOVA) to compare continuous variables. To identify  
4 independent predictors of increased healthcare expenditure, we used  
5 multivariable logistic regression. Variables were entered in the model one by  
6 one and retained when their significance was  $<0.10$ . To evaluate the  
7 discriminatory ability of the resulting predictive model for identifying cirrhotic  
8 patients with healthcare expenditures  $\geq 85$ th percentile, we calculated the area  
9 under the receiver operating characteristic (ROC) curve[15]. Goodness of fit of  
10 the model was evaluated using the Homer-Lemeshow method. Statistical  
11 analyses were performed using SPSS software, version 18.0. All statistical tests  
12 and confidence intervals (CI) were constructed with a type I error level of 5%,  
13 and P-values  $<0.05$  were considered significant.  
14  
15  
16  
17  
18  
19  
20  
21  
22  
23  
24  
25  
26  
27

## 28 **Ethics**

29  
30 The study used retrospective data from administrative databases and patients  
31 were anonymous to the researchers. Our ethics committee stated that under  
32 Spanish legislation informed consent and ethics committee approval were not  
33 required.  
34  
35  
36  
37  
38  
39  
40

## 41 **RESULTS**

### 42 **Demographics of included patients**

43  
44 We documented 34,740 patients in Catalonia with cirrhosis on December 31,  
45 2012 (460 per 100,000 inhabitants); of these 25,299 (72.8%) had never had any  
46 episodes of hepatic decompensation (Compensated group), 5,393 (15.5%) had  
47 had at least one episode of decompensation before 2012 (Previous  
48 decompensation group), and 4,048 (11.7%) had at least one episode of  
49  
50  
51  
52  
53  
54  
55  
56  
57  
58  
59  
60

decompensation during 2012 (Recent decompensation group). In the entire group, mean age was  $61.2 \pm 14$  years and 41.8% were women; however, the proportion of women decreased with worsening disease (44.8% in the Compensated group, 33.8% in the Previous decompensation group, and 33.4% in the Recent decompensation group) ( $p < 0.001$ ).

Patients with advanced liver disease had more comorbidities, and their comorbidities were more severe than those with less advanced disease. There were no significant differences in dementia or depression between groups. (Table 1; see also Table 2S)

Table 1: Demographic characteristics according to liver disease group

|                                          | TOTAL           | Compensated group<br>No hepatic decompensation | Hepatic decompensation                                                           |                                                           |
|------------------------------------------|-----------------|------------------------------------------------|----------------------------------------------------------------------------------|-----------------------------------------------------------|
|                                          |                 |                                                | Previous decompensation group<br>Decompensation before 2012, but not during 2012 | Recent decompensation group<br>Decompensation during 2012 |
| Cases                                    | 34,740          | 25,299                                         | 5,393                                                                            | 4,048                                                     |
| Patients / year                          | 33,567          | 24,737                                         | 5,195                                                                            | 3,635                                                     |
| Age mean $\pm$ SD (years) *              | 61.2 $\pm$ 13.9 | 60.6 $\pm$ 14.4                                | 62.2 $\pm$ 12.6                                                                  | 63.7 $\pm$ 12.7                                           |
| Women (%)                                | 41.7            | 44.8                                           | 33.8                                                                             | 33.4                                                      |
| Morbidity                                |                 |                                                |                                                                                  |                                                           |
| Number of chronic comorbidities (mean) * | 5.1             | 4.7                                            | 6.0                                                                              | 6.5                                                       |
| Stratification group (AMG)*              |                 |                                                |                                                                                  |                                                           |
| Very high-risk stratum (%)               | 11.6            | 7.8                                            | 17.0                                                                             | 27.8                                                      |
| High risk stratum (%)                    | 30.6            | 26.0                                           | 41.0                                                                             | 45.4                                                      |
| Moderate risk stratum (%)                | 35.2            | 38.4                                           | 32.3                                                                             | 22.3                                                      |
| Low risk stratum (%)                     | 22.2            | 27.8                                           | 9.7                                                                              | 4.5                                                       |
| Ischemic heart disease (%)*              | 12.1            | 10.6                                           | 15.3                                                                             | 17.4                                                      |
| Stroke (%)*                              | 6.1             | 5.4                                            | 7.7                                                                              | 8.5                                                       |
| Heart failure (%)*                       | 7.4             | 6.0                                            | 9.8                                                                              | 12.7                                                      |

|                                                         |      |      |      |      |
|---------------------------------------------------------|------|------|------|------|
| Diabetes (%)*                                           | 28.7 | 25.0 | 37.9 | 39.7 |
| Renal failure (%)*                                      | 7.3  | 4.9  | 13.3 | 14.6 |
| COPD (%)*                                               | 15.8 | 12.7 | 20.1 | 21.3 |
| Dementia (%)                                            | 3.1  | 3.0  | 3.2  | 3.7  |
| Depression (%)                                          | 22.3 | 22.2 | 22.3 | 23.2 |
| Malignancy (%)*                                         | 19.0 | 13.5 | 27.9 | 41.3 |
| Malnutrition (%)*                                       | 0.5  | 0.2  | 1.0  | 1.3  |
| Anemia (%)*                                             | 21.3 | 12.1 | 42.5 | 50.7 |
| HIV+ (%)*                                               | 2.6  | 1.7  | 5.1  | 5.0  |
| Hepatitis C virus + (%)*                                | 14.7 | 7.0  | 31.8 | 39.6 |
| Alcohol (%)*                                            | 28.1 | 17.5 | 57.6 | 55.8 |
| Drugs (%)*                                              | 4.2  | 3.0  | 7.5  | 7.5  |
| <b>Mortality and hepatic decompensation during 2013</b> |      |      |      |      |
| Mortality 2013 (%)*                                     | 6.7  | 4.3  | 8.5  | 19.4 |
| Hepatic decompensation 2013 (%)*                        | 11.7 | 2.7  | 21.3 | 54.8 |

AMG: Adjusted morbidity grouper; COPD: chronic obstructive pulmonary disease; HIV: human immunodeficiency virus. \*  $p < 0.001$

Hepatitis C infection was more common in patients who had episodes of decompensation, as was the use of sedatives and alcohol and/or drug abuse.

Overall mortality during 2013 was 6.7%. Mortality was 4.3% in the Compensated group, 8.5% in the Previous decompensation group, and 19.4% in the Recent decompensation group.

Table 3S (supplementary material) shows these patients' probability of dying, adjusted for different factors.

### Use of Health Resources

The overall rate of hospitalizations was 44.4 per 100 patients; the rate increased with severity (29.2 in the Compensated group, 60.8 in the Previous

decompensation group, and 117.9 in the Recent decompensation group;  $p < 0.0001$ ) (Table 2). Table 4S (supplementary material) shows the probability of having at least one urgent hospital admission, adjusted by different factors.

Table 2: Health services utilization in 2013 in function of liver disease group

|                                                                     | Compensated group | Hepatic decompensation                                                           |                                                           |
|---------------------------------------------------------------------|-------------------|----------------------------------------------------------------------------------|-----------------------------------------------------------|
|                                                                     |                   | Previous decompensation group<br>Decompensation before 2012, but not during 2012 | Recent decompensation group<br>Decompensation during 2012 |
| Cases                                                               | 25,299            | 5,393                                                                            | 4,048                                                     |
| Admission rate (x100)*                                              | 29.2              | 60.8                                                                             | 117.9                                                     |
| Mean length of hospitalization (days)*                              | 1.8               | 4.5                                                                              | 9.6                                                       |
| Unplanned admission rate (x100)*                                    | 16.5              | 37.8                                                                             | 78.3                                                      |
| Patients with unplanned admission (%)*                              | 10.8              | 22.9                                                                             | 40.3                                                      |
| Patients >1 unplanned admission (%)*                                | 3.4               | 8.4                                                                              | 18.5                                                      |
| Emergency visit rates (x100)*                                       | 71.2              | 111.1                                                                            | 186.8                                                     |
| Patients with emergency visit (%)*                                  | 33.8              | 45.5                                                                             | 61.4                                                      |
| Patients with >1 emergency visits (%)*                              | 15.7              | 25.7                                                                             | 38.8                                                      |
| Gastroenterology/hepatology specialist outpatient visits (average)* | 0.6               | 1.8                                                                              | 2.6                                                       |
| Other hospital outpatient visits (average)                          | 3.1               | 4.3                                                                              | 4.8                                                       |
| Primary care visits (average)*                                      | 11.8              | 13.4                                                                             | 16.5                                                      |
| Users of a skilled nursing facility (%)*                            | 4.0               | 7.3                                                                              | 15.7                                                      |
| Mental health outpatient visits rate (x100)                         | 16.6              | 13.5                                                                             | 15.1                                                      |
| Psychiatric hospital admission rate (x100)                          | .6                | .7                                                                               | 1.6                                                       |

\*  $p < 0.001$

Likewise, the mean length of hospitalization increased from 1.8 days in compensated patients to 4.5 days in previously decompensated patients to 9.6 days in recently decompensated patients.

The rate of hospital admissions from the emergency room in the entire group was 27 per 100 patients, being 16.5 in the Compensated group, 37.8 in the

1  
2  
3 Previous decompensation group, and 78.3 in the Recent decompensation  
4 group ( $p < 0.0001$ ). Whereas 33.8% of the patients in the Compensated group  
5 presented at the emergency department at least once and 15.7% more than  
6 once, 45.5% of those in the Previous decompensation group presented at least  
7 once and 25.7% more than once, and 61.4% of those in the Recent  
8 decompensation group presented at least once and 38.8% more than once  
9 (Table 2, and table 5S).  
10  
11  
12  
13  
14  
15  
16

17 Similarly, the number of gastroenterology outpatient visits significantly  
18 increased with hepatic decompensation. The number of outpatient visits to  
19 other departments also increased, but the difference did not reach statistical  
20 significance.  
21  
22  
23  
24  
25  
26  
27

28 All patients had frequent contact with primary care physicians and/or nurses;  
29 the number of primary care visits increased with decompensation (11.8 in the  
30 Compensated group, 13.4 in the Previous decompensation group, and 16.5 in  
31 the Recent decompensation group;  $p < 0.0001$ ). The rate of outpatient visits to  
32 mental health centers and the rate of psychiatric hospitalization did not differ  
33 among groups. Moreover, the sicker patients were, the more they required  
34 social services from convalescence centers, intermediate- or long-stay centers,  
35 and palliative care centers  
36  
37  
38  
39  
40  
41  
42  
43  
44  
45

#### 46 47 48 **Assessment of healthcare expenditure** 49

50 During 2013, a total of €142.1 million was spent in the care of cirrhotic patients  
51 in Catalonia (1.8% of the total 2013 healthcare budget), representing an  
52 average expenditure of €4,234 per patient/year.  
53  
54  
55  
56  
57  
58  
59  
60

1  
2  
3 Figure 1 displays the distribution of healthcare-related expenditures in cirrhotic  
4 patients and in the general population of Catalonia. In cirrhotic patients, the  
5 main source of expenditure was hospitalization (for all causes), which  
6 accounted for 35.1% of the total; pharmacy costs accounted for 30%, primary  
7 care for 11.8%, and hospital outpatient care for 10.6%. In contrast, in the  
8 general population the main source of expenses were hospitalization (27.3%),  
9 pharmacy (26.1%), primary care (23.2%), and hospital outpatient care (10.7%).  
10  
11  
12  
13  
14  
15  
16  
17  
18  
19

20 Figure 2 shows the distribution of healthcare-related expenditures in cirrhotic  
21 patients, stratified by age group. Despite some differences in resource use and  
22 expenditure among the different age groups, hospitalization accounted for the  
23 greatest expenditure in all groups.  
24  
25  
26  
27  
28  
29

30  
31 Total medical expenditure was significantly higher for patients in the Recent  
32 decompensation group than for those in the Previous decompensation and  
33 compensated groups. In the Recent decompensation group, hospitalization was  
34 the main expenditure, accounting for more than half of all costs (Figure 3). By  
35 contrast, the total expenditure in the Compensated group was divided nearly  
36 equally among pharmacy, hospitalization, and outpatient care (hospital and  
37 primary care). The distribution of expenditures in the Previous decompensation  
38 group lay between those of the other two groups. Figure 3 also shows the  
39 distribution of expenditures in 2013 in patients in the Recent decompensation  
40 group according to the type of hepatic decompensation occurring in 2012;  
41 hepatorenal syndrome, followed by spontaneous bacterial peritonitis and  
42  
43  
44  
45  
46  
47  
48  
49  
50  
51  
52  
53  
54  
55  
56  
57  
58  
59  
60

1  
2  
3 hepatic encephalopathy, generated much higher expenditures than other  
4 complications, mainly due to hospitalization.  
5  
6  
7

8  
9 In cirrhotic patients, the average healthcare expenditure increased with the  
10 number of chronic comorbidities, from €773/year in patients with one  
11 comorbidity to €14,853/year in those with >9 comorbidities. The AMG stratum  
12 was higher in patients with more comorbidities, and expenditures increased  
13 exponentially with increasing AMG strata, from less than €900 for patients in the  
14 low risk stratum to more than €15,000 for those in the very high risk stratum  
15 (Figure 4).  
16  
17  
18  
19  
20  
21  
22  
23

24 In patients with lower healthcare resource use (with expenditures < 85<sup>th</sup>  
25 percentile), expenditures were nearly equally distributed among primary care,  
26 pharmacy, and hospitalization. In patients with the highest healthcare resource  
27 use (expenditures ≥ 85<sup>th</sup> percentile), hospitalization accounted for nearly half of  
28 all expenditures; total healthcare expenditure in this group was ten times higher  
29 (€17,822 vs €1,806 patient/year) than in patients with lower resource use.  
30  
31  
32  
33  
34  
35  
36  
37  
38

39 Table 3 reports the multivariable logistic regression analysis to identify  
40 predictors of high expenditure. Morbidity burden (AMG stratum), HIV infection,  
41 hospitalization, and emergency room visits during 2012 were associated with  
42 expenditures greater than or equal to the 85th percentile (i.e., > €7,275 per  
43 patient). The area under the ROC curve for identifying patients with  
44 expenditures greater than or equal to 85th percentile was 0.888 (95% CI:  
45 0.883–0.893, Hosmer-Lemeshow test: X<sup>2</sup>: 29.997 (p<0.001)) . These results  
46  
47  
48  
49  
50  
51  
52  
53  
54  
55  
56  
57  
58  
59  
60



show that the model identifies which patients will have higher health expenditures.

Table 3: Multivariable logistic regression analyzing factors associated with expenditure higher than the 85th percentile

|                                                | n      | $\beta$<br>coefficient | OR      | 95% CI  |         |
|------------------------------------------------|--------|------------------------|---------|---------|---------|
| <b>Sex</b>                                     |        |                        |         |         |         |
| Male                                           | 18,783 |                        | 1       | --      | --      |
| Female                                         | 13,631 | -0.034                 | 0.967   | 0.890   | 1.050   |
| <b>Age group</b>                               |        |                        |         |         |         |
| 18-44 years old                                | 4,152  |                        | 1       | --      | --      |
| 45-64 years old                                | 15,027 | 0.037                  | 1.037   | 0.881   | 1.222   |
| 65-74 years old                                | 7,540  | -0.154                 | 0.858   | 0.720   | 1.022   |
| 75-84 years old                                | 4,750  | -0.515                 | 0.597   | 0.496   | 0.720   |
| >84 years old                                  | 945    | -1.209                 | 0.299   | 0.225   | 0.396   |
| <b>Hepatic decompensation</b>                  |        |                        |         |         |         |
| Compensated group                              | 24,219 |                        | 1       | --      | --      |
| Previous decompensation group                  | 4,934  | 0.311                  | 1.364   | 1.230   | 1.514   |
| Recent decompensation group                    | 3,261  | 0.687                  | 1.988   | 1.770   | 2.234   |
| <b>Risk stratum (morbidity burden)</b>         |        |                        |         |         |         |
| Low risk stratum                               | 7,694  |                        | 1       | --      | --      |
| Moderate risk stratum                          | 12,202 | 1.126                  | 3.082   | 2.454   | 3.870   |
| High risk stratum                              | 9,758  | 2.769                  | 15.944  | 12.780  | 19.891  |
| Very high risk stratum                         | 2,760  | 4.850                  | 127.704 | 100.533 | 162.218 |
| Chronic kidney disease                         | 2,075  | 0.113                  | 1.120   | 0.988   | 1.269   |
| Hepatitis C virus +                            | 4,377  | 0.429                  | 1.536   | 1.389   | 1.699   |
| HIV+                                           | 823    | 2.930                  | 18.734  | 15.374  | 22.828  |
| <b>Unplanned hospitalization during 2012</b>   |        |                        |         |         |         |
| 0                                              | 27,687 |                        | 1       | --      | --      |
| 1                                              | 3,208  | 0.117                  | 1.124   | 0.992   | 1.274   |
| 2                                              | 944    | 0.168                  | 1.183   | 0.974   | 1.437   |
| 3                                              | 326    | 0.461                  | 1.586   | 1.176   | 2.139   |
| >3                                             | 249    | 0.507                  | 1.660   | 1.166   | 2.363   |
| <b>Emergency department visits during 2012</b> |        |                        |         |         |         |
| 0                                              | 20,034 |                        | 1       | --      | --      |
| 1-2                                            | 8,919  | 0.190                  | 1.209   | 1.095   | 1.334   |
| 3-5                                            | 2,648  | 0.415                  | 1.514   | 1.314   | 1.743   |
| >5                                             | 813    | 0.580                  | 1.785   | 1.431   | 2.226   |
| Skilled nursing facility during 2012           | 820    | -0.339                 | 0.713   | 0.587   | 0.865   |
| Constant                                       |        | -4.593                 | 0.010   | --      | --      |

**OR:** Odds Ratio. **CI:** Confidence Interval. **HIV:** Human immunodeficiency virus

## DISCUSSION

In our study, liver cirrhosis had an important impact on healthcare expenditures, and hospitalization and pharmacy accounted for the largest proportion of costs associated with treating cirrhotic patients. To our knowledge, this is the first population-based study to quantify the total economic impact of cirrhosis in relation to hepatic decompensation and to determine the distribution of costs (including those related with primary, nursing, hospital, and mental health care as well as physical therapy and pharmacy) in treating patients with this condition.

This population-based study conducted in Catalonia included around 7,500,000 million people, which is comparable to the population of some European countries.

In recent years, many studies have estimated the economic burden of hepatitis and cirrhosis[16] because these conditions are associated with high morbidity, mortality, and economic costs. Although one of these analyzed the cost of care over the last year of life in patients with an end-stage liver disease [17], it was not a population-based study like ours. Another study described the direct costs related to hospital admissions in patients with cirrhosis [10]. By contrast, our study included all healthcare-related expenses in patients with cirrhosis (during hospitalization and afterwards). Another study analyzed both direct and indirect costs of chronic liver disease, but included all patients, not only those with cirrhosis [18].

Liver cirrhosis leads to 800,000 deaths every year, representing 1.3% of all deaths worldwide. According to the World Health Organization, cirrhosis is

1  
2  
3 among the eighteen most common causes of death[11]. Five-year survival is  
4 36% in alcoholic cirrhosis and 14% in nonalcoholic cirrhosis [11]. We found that  
5 mortality increased significantly in patients who had a recent hepatic  
6 decompensation, and the risk of mortality increased nearly 20% in patients with  
7 a decompensation in the previous 12 months.  
8  
9  
10  
11  
12

13  
14  
15 The total cost of treating cirrhotic patients in Catalonia in 2013 was almost €150  
16 million (€4,234 per patient). Hospitalization remains the main source of  
17 healthcare-related expenditure, followed by medication, although hospital  
18 mortality has decreased in recent years[16]. Patients with more advanced liver  
19 disease required more healthcare (more days hospitalized, emergency visits,  
20 and primary care visits ) and more medication, generating greater expenditures.  
21  
22 In patients with cirrhosis, the probability of dying within a year of a hepatic  
23 decompensation is 34%[19]. In our study, mortality was nearly 2.3 times higher  
24 in patients with a recent decompensation than in patients who had gone at least  
25 a year since a prior decompensation and 4.5 times higher than those who had  
26 never had a decompensation. Our model's ability to differentiate patients who  
27 will require high expenditures suggests that our study can be useful in health  
28 planning, resource allocation, and evaluation of results.  
29  
30  
31  
32  
33  
34  
35  
36  
37  
38  
39  
40  
41  
42  
43  
44  
45

46 Our large database allowed us to calculate the morbidity burden using the  
47 AMG[20] and to stratify the risk of morbimortality. In our population, morbidities  
48 were common, and greater severity of liver disease was associated with higher  
49 morbidity burden (>75% of all patients were in moderate or higher risk strata:  
50 72.2% in the Compensated group, 90.3% in the Previous decompensation  
51  
52  
53  
54  
55  
56  
57  
58  
59  
60

1  
2  
3 group, and 95.5% in the Recent decompensation group). Moreover,  
4 expenditures increased with increasing AMG strata, so controlling comorbidities  
5 is one way to reduce costs.  
6  
7

8  
9 Another way to reduce costs is to modify the natural history of the liver disease.  
10 Studies that have analyzed the direct and indirect costs of treating hepatitis C  
11 infection point out that costs rise with the natural history of the disease  
12 [17,21,22]. New antiviral agents against hepatitis C have modified the natural  
13 history of the disease, but the impact of these agents on the overall cost of  
14 treating patients with hepatitis C infection will not become clear until a few years  
15 have passed [23]. Nevertheless, our results suggest that this impact is likely to  
16 be significant because expenditures in patients with recent hepatic  
17 decompensation totaled more than twice those in patients who had not had a  
18 decompensation for at least one year and more than 3 times those in patients  
19 with compensated cirrhosis.  
20  
21  
22  
23  
24  
25  
26  
27  
28  
29  
30  
31  
32  
33  
34

35 Although some studies have analyzed the costs of caring for other diseases  
36 such as diabetes mellitus [24] or heart failure [20], to our knowledge, this is the  
37 first population-based study to analyze morbidity and costs in patients with liver  
38 disease taking into account hepatic decompensation. Although several studies  
39 have evaluated some aspects involved in caring for cirrhotic patients  
40 (hospitalization, care giving hours) [2], our study analyzed overall costs,  
41 including expenditures on nursing, primary care, and mental health.  
42  
43  
44  
45  
46  
47  
48  
49  
50  
51

52 Limitations: The use of a general population database minimized selection bias  
53 and allowed us to analyze a real-world population. However, using  
54 administrative data to identify cirrhotic patients can lead to misclassification,  
55  
56  
57  
58  
59  
60

1  
2  
3 especially in patients diagnosed in private centers who have not used public  
4 resources.  
5

6  
7  
8 Moreover, this administrative database did not include important information  
9  
10 such as the etiology of cirrhosis (although alcohol consumption and/or hepatitis  
11 C infection are recorded in the database) or other important clinical data for  
12 characterizing and understanding the study population and the evolution of the  
13 disease. For these reasons, we cannot calculate classical scores such as  
14 MELD, Child-Pugh, or ACLF.  
15  
16

17  
18  
19 Patients' need for social services increases when liver disease becomes  
20 decompensated. The costs associated with this increase are, however, difficult  
21 to quantify and vary widely among health systems. Although these data are  
22 provided in the supplementary data, caution is warranted in interpreting these  
23 results.  
24  
25

26  
27  
28 Finally, we excluded patients who died during 2013 from the analysis of risk  
29 factors, although they were included in the analysis of healthcare expenditures.  
30  
31 The reason for this exclusion is that patients who died during the study period  
32 were excluded from the assessment of predictors of increased expenditure.  
33  
34 Although this exclusion could lead to bias, the cost of these patients after their  
35 death was zero. Therefore, the inclusion of dead patients in the analysis could  
36 lead to a possible bias in the calculation of the odd ratios of risk factors and  
37 consequently to errors in interpretation when diseases with high mortality are  
38 analyzed. Among the possible solutions for this bias, we opted for the simplest  
39 solution, and we analyzed only patients who remained alive throughout the  
40 year. This strategy has two main advantages: simplicity and robustness. In  
41 contrast to similar strategies, each of which introduces some sort of bias, we  
42  
43  
44  
45  
46  
47  
48  
49  
50  
51  
52  
53  
54  
55  
56  
57  
58  
59  
60

1  
2  
3 believe it is better to use the simplest and easiest strategy to explain and  
4  
5 understand the data. Moreover, one of the strengths of our study is that as it is  
6  
7 a population-based study with real data, there is no need for methodological  
8  
9 sophistication when a simpler strategy can be used.  
10

## 11 12 13 **CONCLUSIONS**

14  
15 Cirrhosis results in high healthcare resource utilization, leading to high  
16  
17 expenditures. On December 31, 2012, the point prevalence in Catalonia was  
18  
19 459.9 per 100,000 inhabitants. The cost of treating cirrhotic patients was high  
20  
21 because more than 75% had moderate to very high risk according to their AMG  
22  
23 morbidity burden. The main expenditure was hospitalization; its weight in the  
24  
25 total expenditure increased with decompensation.  
26  
27

28  
29 Avoiding excessive alcohol consumption and eradicating hepatitis C infection  
30  
31 with the new antiviral agents will probably modify the natural history of cirrhosis,  
32  
33 reducing morbidity and mortality and consequently expenditures in these  
34  
35 patients.  
36  
37

38  
39  
40  
41  
42  
43  
44 **Contributor ship statement:** All authors have contributed in the concept and design,  
45  
46 Montserrat Clèries (MC) and Emili Vela (EV) in data acquisition and statistical analysis, Mireia  
47  
48 Miquel (MM), Mercedes Vergara (MV), MC, and EV in interpretation of data, and MM and  
49  
50 MV in writing the manuscript. All authors have supervised and approved the manuscript.  
51  
52

53  
54  
55  
56 **Conflict of Interest:** None of the authors declare any conflict of interest.  
57  
58

**Funding:** The authors received no financial support.

**Data Sharing Statement:** Data are not included in this submission due to legal and privacy stipulations from CatSalut (Catalan Health Department). Data are available to those completing the request for research identifiable files from the CatSalut upon acceptance by the Catalan Health Department. For contact, please reach the Analysis on Demand and Activity Division, Catalan Health Service

## REFERENCES

1. Adams LA, Lymp JF, St Sauver J, Sanderson SO, Lindor KD, Feldstein A, et al. The natural history of nonalcoholic fatty liver disease: a population-based cohort study. *Gastroenterology*. 2005 Jul;129(1):113–21.
2. Rakoski MO, McCammon RJ, Piette JD, Iwashyna TJ, Marrero JA, Lok AS, et al. Burden of cirrhosis on older Americans and their families: analysis of the health and retirement study. *Hepatology*. 2012 Jan;55(1):184–91.
3. Sayiner M, Koenig A, Henry L, Younossi ZM. Epidemiology of Nonalcoholic Fatty Liver Disease and Nonalcoholic Steatohepatitis in the United States and the Rest of the World. *Clin Liver Dis*. 2016 May;20(2):205–14.
4. Otgonsuren M, Henry L, Hunt S, Venkatesan C, Mishra A, Younossi ZM. Resource utilization and survival among Medicare patients with advanced liver disease. *Dig Dis Sci*. 2015 Feb;60(2):320–32.
5. Asrani SK, Kamath PS. Natural history of cirrhosis. *Curr Gastroenterol Rep*. 2013 Feb;15(2):308.
6. Jafri S-MR, Gordon SC. The consequences of cirrhosis in America. *Dig Dis Sci*. 2015 Feb;60(2):283–4.
7. García-Fulgueiras A, García-Pina R, Morant C, de Larrea-Baz NF, Alvarez E. Burden of disease related to hepatitis C and hepatitis B in Spain: a methodological challenge of an unfolding health problem. *J Viral Hepat*. 2011 Oct;18(10):e453-60.
8. Mathers C, Stein C, Ma Fat D, Al. E. Global Burden of disease 2000: version 2 methods and results. Global Programme on Evidence for Health Policy Discussion Paper No 50. Geneva. World Health Organization. 2002. <http://www.who.int/healthinfo/paper50.pdf>. 2002.
9. Chung W. The cost of liver disease in Korea: methodology, data, and evidence.

- 1  
2  
3 Clin Mol Hepatol. 2015 Mar;21(1):14–21.
- 4 10. Vitor S, Marinho RT, Gíria J, Velosa J. An observational study of the direct costs  
5 related to hospital admissions, mortality and premature death associated with  
6 liver disease in Portugal. BMC Res Notes. 2016 Jan;9(1):62.
- 7 11. Akbari Sari A, Kazemi Karyani A, Alavian SM, Arab M, Rostami  
8 Gholmohamadi F, Rezaei S. The Economic Burden of Liver Cirrhosis in Iran: a  
9 Cost of Illness Study. Iran J Public Health. 2015 Apr;44(4):512–21.
- 10 12. Charlson ME, Pompei P, Ales KL, MacKenzie CR. A new method of classifying  
11 prognostic comorbidity in longitudinal studies: development and validation. J  
12 Chronic Dis. 1987 Jan;40(5):373–83.
- 13 13. Deyo RA, Cherkin DC, Ciol MA. Adapting a clinical comorbidity index for use  
14 with ICD-9-CM administrative databases. J Clin Epidemiol. 1992 Jun;45(6):613–  
15 9.
- 16 14. Dueñas-Espín I, Vela E, Pauws S, Bescos C, Cano I, Cleries M, et al. Proposals  
17 for enhanced health risk assessment and stratification in an integrated care  
18 scenario. BMJ Open. 2016 Jan;6(4):e010301.
- 19 15. Hanley JA, McNeil BJ. The meaning and use of the area under a receiver  
20 operating characteristic (ROC) curve. Radiology. 1982 Apr;143(1):29–36.
- 21 16. Vergara M, Clèries M, Vela E, Bustins M, Miquel M, Campo R. Hospital  
22 mortality over time in patients with specific complications of cirrhosis. Liver Int.  
23 2013 Jul;33(6):828–33.
- 24 17. Gola A, Davis S, Greenslade L, Hopkins K, Low J, Marshall A, et al. Economic  
25 Analysis of Costs for Patients With End Stage Liver Disease Over the Last Year  
26 of Life. BMJ Support Palliat Care. 2015;5(1):110.2-110.
- 27 18. Stepanova M, De Avila L, Afendy M, Younossi I, Pham H, Cable R, et al. Direct  
28 and Indirect Economic Burden of Chronic Liver Disease in the United States.  
29 Clin Gastroenterol Hepatol. 2016 Jul 25;
- 30 19. Solà R, Alvarez MA, Ballesté B, Montoliu S, Rivera M, Miquel M, et al.  
31 Probability of liver cancer and survival in HCV-related or alcoholic-  
32 decompensated cirrhosis. A study of 377 patients. Liver Int. 2006 Feb;26(1):62–  
33 72.
- 34 20. Farré N, Vela E, Clèries M, Bustins M, Cainzos-Achirica M, Enjuanes C, et al.  
35 Medical resource use and expenditure in patients with chronic heart failure: a  
36 population-based analysis of 88 195 patients. Eur J Heart Fail. 2016 Apr 25;
- 37 21. Gray E, O’Leary A, Kieran JA, Fogarty E, Dowling T, Norris S. Direct costs of  
38 interferon-based and interferon-free direct-acting antiviral regimens for the  
39 treatment of chronic hepatitis C infection. J Viral Hepat. 2016 Mar 21;
- 40 22. Martin NK, Vickerman P, Dore GJ, Grebely J, Miners A, Cairns J, et al.  
41 Prioritization of HCV treatment in the direct-acting antiviral era: An economic  
42 evaluation. J Hepatol. 2016 Feb 8;
- 43 23. Manos MM, Darbinian J, Rubin J, Ray GT, Shvachko V, Denis B, et al. The  
44 effect of hepatitis C treatment response on medical costs: a longitudinal analysis  
45 in an integrated care setting. J Manag Care Pharm. Jan;19(6):438–47.
- 46 24. Economic Costs of Diabetes in the U.S. in 2007. Diabetes Care. 2008 Feb  
47 27;31(3):596–615.
- 48  
49  
50  
51  
52  
53  
54  
55  
56  
57  
58  
59  
60



1  
2  
3  
4  
5  
6 TABLE AND FIGURE LEGENDS:  
7

8 Table 1: Demographic characteristics according to liver disease group  
9

10  
11 Table 2: Health services utilization in 2013 stratified by liver disease group  
12

13  
14 Table 3: Multivariable logistic regression analyzing factors associated with  
15 expenditure higher than the 85th percentile  
16  
17

18  
19 Figure 1: Health expenditure by type of resource in the general population and  
20 in cirrhotic patients, in millions of euros. The category "Other" includes mental  
21 health services, non-urgent medical transportation, outpatient rehabilitation, and  
22 home oxygen therapy.  
23  
24  
25  
26  
27

28  
29 Figure 2: Healthcare resource use in cirrhotic patients by age.  
30

31  
32 Figure 3: Healthcare resource use in cirrhotic patients by hepatic  
33 decompensation.  
34

35  
36 Figure 4: Healthcare resource use in cirrhotic patients by risk stratification  
37 (morbidity burden).  
38  
39

40  
41 **Supplementary information**  
42

43 Appendix 1: Hepatic decompensation codes  
44

45  
46 Table 1S: Mean price by activity  
47

48 Table 2S: Demographic characteristics stratified by specific hepatic  
49 decompensation during 2012  
50

51 Table 3S: Probability of these patients dying, adjusted for different factors  
52  
53

54 Table 4S: Multivariable logistic regression analyzing factors associated with any  
55 hospitalization cause  
56  
57

1  
2  
3  
4  
5  
6  
7  
8  
9  
10  
11  
12  
13  
14  
15  
16  
17  
18  
19  
20  
21  
22  
23  
24  
25  
26  
27  
28  
29  
30  
31  
32  
33  
34  
35  
36  
37  
38  
39  
40  
41  
42  
43  
44  
45  
46  
47  
48  
49  
50  
51  
52  
53  
54  
55  
56  
57  
58  
59  
60

Table 5S: Health services utilization by specific hepatic decompensation during 2012

For peer review only

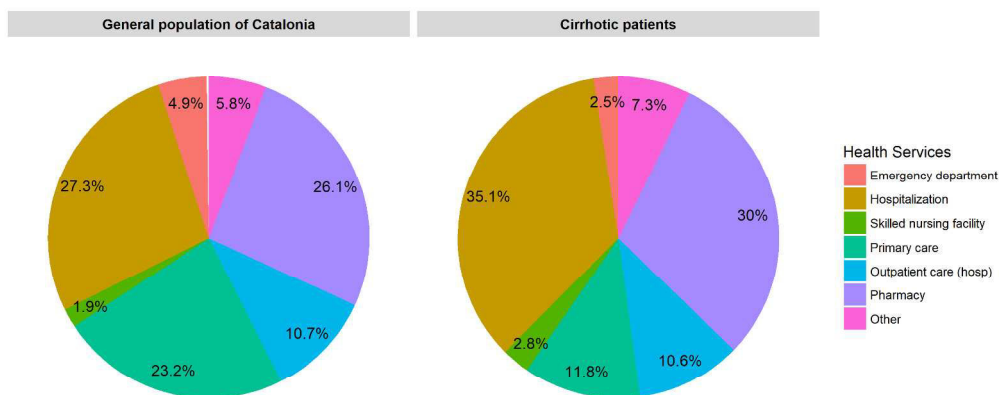

Health expenditure by type of resource in the general population and in cirrhotic patients, in millions of euros.

253x126mm (300 x 300 DPI)

review only

1  
2  
3  
4  
5  
6  
7  
8  
9  
10  
11  
12  
13  
14  
15  
16  
17  
18  
19  
20  
21  
22  
23  
24  
25  
26  
27  
28  
29  
30  
31  
32  
33  
34  
35  
36  
37  
38  
39  
40  
41  
42  
43  
44  
45  
46  
47  
48  
49  
50  
51  
52  
53  
54  
55  
56  
57  
58  
59  
60

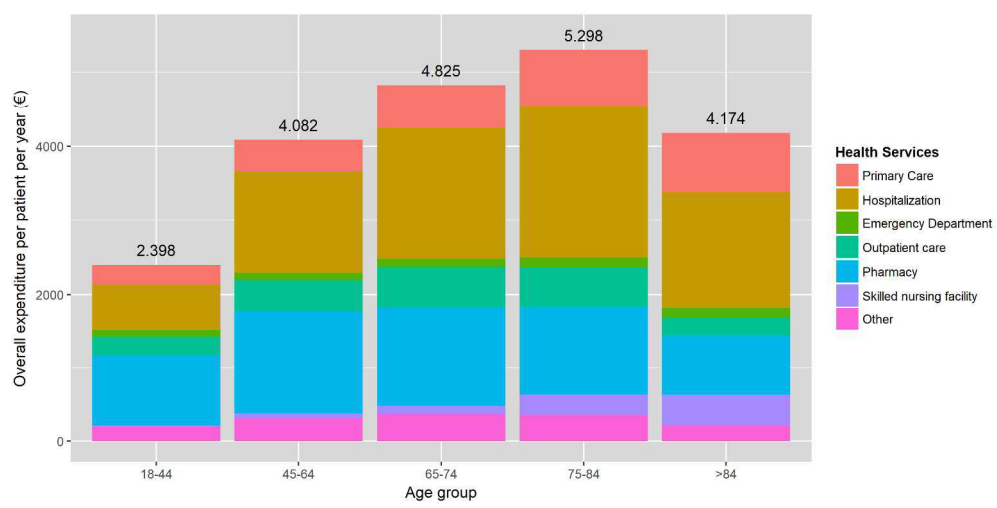

Healthcare resource use in cirrhotic patients by age

253x126mm (300 x 300 DPI)

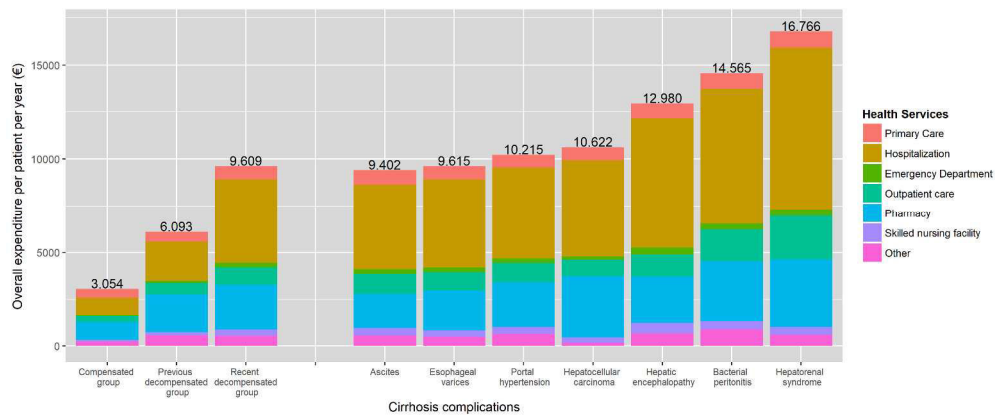

Healthcare resource use in cirrhotic patients by hepatic decompensation.

304x126mm (300 x 300 DPI)

Peer review only

1  
2  
3  
4  
5  
6  
7  
8  
9  
10  
11  
12  
13  
14  
15  
16  
17  
18  
19  
20  
21  
22  
23  
24  
25  
26  
27  
28  
29  
30  
31  
32  
33  
34  
35  
36  
37  
38  
39  
40  
41  
42  
43  
44  
45  
46  
47  
48  
49  
50  
51  
52  
53  
54  
55  
56  
57  
58  
59  
60

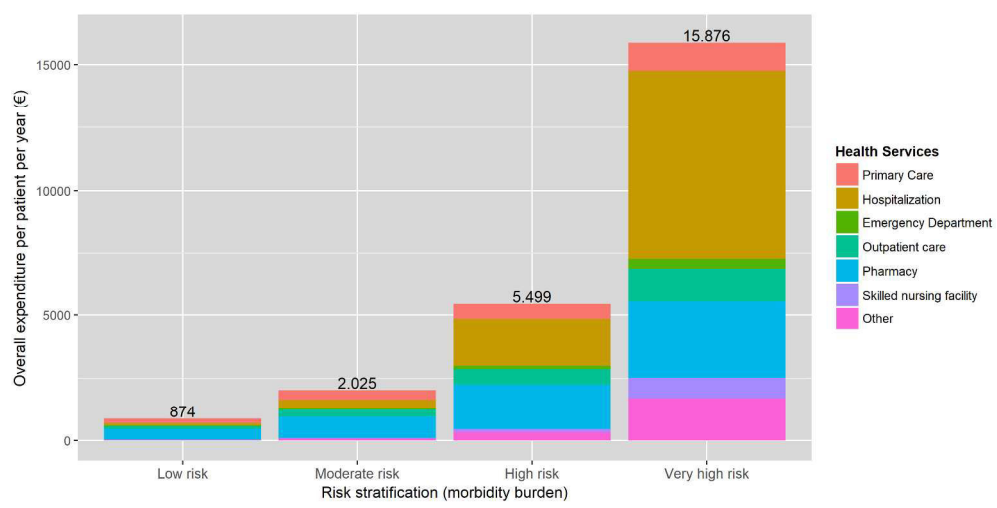

Healthcare resource use in cirrhotic patients by risk stratification (morbidity burden).

253x126mm (300 x 300 DPI)

1  
2  
3 SUPPLEMENTARY MATERIAL:  
4  
5  
6

7 Appendix 1: Hepatic decompensation codes:

- 8  
9  
10  
11  
12  
13  
14  
15  
16  
17  
18  
19  
20  
21  
22  
23  
24
- Encephalopathy: 572.2, 070.2, 070.4, 070.6, 070.71
  - Portal hypertension: 572.3
  - Hepatorenal syndrome: 572.4
  - Spontaneous bacterial peritonitis: 032.83, 567.xx, 569.5
  - Hepatocellular carcinoma: 155.0, 155.2, 197.7
  - Ascites: 789.5
  - Esophageal varices with or without bleeding: 456.0, 456.1, 456.2x

25 Table 1S: Mean price by activity

26  
27  
28  
29  
30  
31  
32  
33  
34  
35  
36  
37  
38  
39  
40  
41  
42  
43  
44  
45  
46  
47  
48  
49  
50  
51  
52  
53  
54  
55  
56  
57  
58  
59  
60

|                          |                          |
|--------------------------|--------------------------|
| Primary care visits      |                          |
| Physician                | € 38.04 per visit        |
| Home visit (physician)   | € 45.65 per visit        |
| Nurse                    | € 22.83 per visit        |
| Home visit (nurse)       | € 27.39 per visit        |
| Specialist visit         | € 58.46 per visit        |
| Mental health visit      | € 75.31 per visit        |
| Emergency room visit     | € 106.38 per visit       |
| Hospital admission       | € 2,150.64 per admission |
| Skilled nursing facility |                          |
| Long term                | € 50.22 per day          |
| Convalescence            | € 86.91 per day          |

|                                   |                        |
|-----------------------------------|------------------------|
| Mental health admission           |                        |
| Acute                             | € 183.31 per day       |
| Sub-acute                         | € 115.35 per day       |
| Minor outpatient surgery          | € 156.84 per surgery   |
| Outpatient Care Clinics           | € 169.35 per day       |
| Hospital at home                  | € 950.00 per admission |
| Outpatient rehabilitation         | € 213.39 per session   |
| Non-urgent medical transportation | € 61.34 per act        |
| Home oxygen therapy               | € 49.12 per session    |
| Dialysis                          | € 151.20 per session   |



Table 2S: Demographic characteristics stratified by specific hepatic decompensation during 2012

|                                  | TOTAL      | Specific hepatic decompensation during 2012 |            |            |            |            |            |               |
|----------------------------------|------------|---------------------------------------------|------------|------------|------------|------------|------------|---------------|
|                                  |            | EV                                          | HE         | SBP        | HRS        | CHC        | ASC        | PHT           |
| Cases                            | 4,048      | 1800                                        | 815        | 293        | 68         | 1006       | 786        | 1878          |
| Patients / year                  | 3,635      | 1613                                        | 664        | 252        | 49         | 852        | 689        | 1697          |
| Age* (mean±SD)<br>(years)        | 63.7 ±12.7 | 62.6 ±12.6                                  | 63.4 ±12.3 | 62.2 ±12.5 | 61.8 ±12.8 | 68.3 ±10.7 | 62.1 ±12.3 | 61.8<br>±12.8 |
| Women (%)                        | 33.4       | 31.3                                        | 36.0       | 30.7       | 33.8       | 27.7       | 34.6       | 32.9          |
| <b>Morbidity</b>                 |            |                                             |            |            |            |            |            |               |
| Number of chronic co-morbidities |            | 6.5                                         | 7.1        | 6.8        | 7.5        | 7.3        | 6.0        | 6.5           |
| Stratification groups (AMG)      |            |                                             |            |            |            |            |            |               |
| Very high-risk stratum           |            | 27.9                                        | 40.9       | 36.9       | 44.1       | 28.0       | 26.8       | 29.1          |
| High risk stratum                |            | 45.5                                        | 42.8       | 43.3       | 45.6       | 56.2       | 40.5       | 44.3          |
| Moderate risk stratum            |            | 23.2                                        | 14.1       | 16.4       | 10.3       | 15.5       | 23.8       | 22.6          |
| Low risk stratum                 |            | 3.4                                         | 2.2        | 3.4        | 0.0        | 0.3        | 8.9        | 4.0           |

**EV:** Esophageal Varices; **HE:** Encephalopathy; **SBP:** Spontaneous bacterial peritonitis; **HRS:** Hepatorenal syndrome; **CHC:** Hepatocellular carcinoma; **ASC:** Ascites. **PHT:** Portal Hypertension; **AMG:** Adjusted Morbidity Groups.

Table 3S: Multivariable logistic regression analyzing factors associated with mortality

|                                                | n      | $\beta$<br>coefficient | OR     | 95% CI |        |
|------------------------------------------------|--------|------------------------|--------|--------|--------|
| <b>Sex</b>                                     |        |                        |        |        |        |
| Male                                           | 20,231 |                        | 1      | --     | --     |
| Female                                         | 14,509 | -0.318                 | 0.727  | 0.658  | 0.804  |
| <b>Age group</b>                               |        |                        |        |        |        |
| 18-44 years old                                | 4,214  |                        | 1      | --     | --     |
| 45-64 years old                                | 15,671 | 0.338                  | 1.402  | 1.058  | 1.857  |
| 65-74 years old                                | 8,132  | 1.849                  | 1.386  | 2.465  | 1.849  |
| 75-84 years old                                | 5,497  | 2.761                  | 2.069  | 3.684  | 2.761  |
| >84 years old                                  | 1,226  | 5.992                  | 4.368  | 8.220  | 5.992  |
| <b>Hepatic decompensation</b>                  |        |                        |        |        |        |
| Compensated group                              | 25,299 |                        | 1      | --     | --     |
| Previous decompensation group                  | 5,393  | 0.314                  | 1.369  | 1.202  | 1.558  |
| Recent decompensation group                    | 4,048  | 2.030                  | 1.792  | 2.299  | 2.030  |
| <b>Risk stratum (morbidity burden)</b>         |        |                        |        |        |        |
| Low risk stratum                               | 7,724  |                        | 1      | --     | --     |
| Moderate risk stratum                          | 12,367 | 0.951                  | 2.588  | 1.747  | 3.835  |
| High risk stratum                              | 10,622 | 11.348                 | 7.805  | 16.500 | 11.348 |
| Very high risk stratum                         | 4,027  | 42.673                 | 29.180 | 62.403 | 42.673 |
| <b>Chronic kidney disease</b>                  | 2,542  | 0.790                  | 0.694  | 0.899  | 0.790  |
| <b>Hepatitis C virus +</b>                     | 5,096  | 1.213                  | 1.081  | 1.360  | 1.213  |
| <b>HIV+</b>                                    | 903    | 0.973                  | 0.743  | 1.274  | 0.973  |
| <b>Unplanned hospitalization during 2012</b>   |        |                        |        |        |        |
| 0                                              | 28,884 |                        | 1      | --     | --     |
| 1                                              | 3,788  | 0.224                  | 1.251  | 1.086  | 1.440  |
| 2                                              | 1,207  | 1.201                  | 0.987  | 1.461  | 1.201  |
| 3                                              | 459    | 1.150                  | 0.879  | 1.504  | 1.150  |
| >3                                             | 402    | 1.560                  | 1.166  | 2.088  | 1.560  |
| <b>Emergency department visits during 2012</b> |        |                        |        |        |        |
| 0                                              | 20,699 |                        | 1      | --     | --     |
| 1-2                                            | 9,712  | 0.073                  | 1.076  | 0.945  | 1.225  |
| 3-5                                            | 3,237  | 1.497                  | 1.271  | 1.762  | 1.497  |
| >5                                             | 1,092  | 1.576                  | 1.253  | 1.982  | 1.576  |
| <b>Skilled nursing facility during 2012</b>    | 1,234  | 2.127                  | 1.832  | 2.470  | 2.127  |
| <b>Constant</b>                                |        | 0.003                  | 0.003  | --     | --     |

Table 4S: Multivariable logistic regression analyzing factors associated with hospitalization for any cause

|                                                | n      | $\beta$<br>coefficient | OR      | 95% CI  |         |
|------------------------------------------------|--------|------------------------|---------|---------|---------|
| <b>Sex</b>                                     |        |                        |         |         |         |
| Male                                           | 20,231 |                        | 1       | --      | --      |
| Female                                         | 14,509 | -0.009                 | 0.991   | 0.918   | 1.069   |
| <b>Age group</b>                               |        |                        |         |         |         |
| 18-44 years old                                | 4,214  |                        | 1       | --      | --      |
| 45-64 years old                                | 15,671 | -0.369                 | 0.691   | 0.590   | 0.810   |
| 65-74 years old                                | 8,132  | -0.540                 | 0.583   | 0.493   | 0.689   |
| 75-84 years old                                | 5,497  | -0.476                 | 0.621   | 0.523   | 0.738   |
| >84 years old                                  | 1,226  | -0.315                 | 0.730   | 0.587   | 0.907   |
| <b>Hepatic decompensation</b>                  |        |                        |         |         |         |
| Compensated group                              | 25,299 |                        | 1       | --      | --      |
| Previous decompensation group                  | 5,393  | 0.405                  | 1.499   | 1.362   | 1.650   |
| Recent decompensation group                    | 4,048  | 0.714                  | 2.041   | 1.840   | 2.265   |
| <b>Risk stratum (morbidity burden)</b>         |        |                        |         |         |         |
| Low risk stratum                               | 7,724  |                        | 1       | --      | --      |
| Moderate risk stratum                          | 12,367 | 1.609                  | 4.997   | 3.653   | 6.837   |
| High risk stratum                              | 10,622 | 3.759                  | 42.917  | 31.679  | 58.141  |
| Very high risk stratum                         | 4,027  | 5.879                  | 357.497 | 261.233 | 489.235 |
| <b>Chronic kidney disease</b>                  | 2,542  | -0.549                 | 0.578   | 0.515   | 0.647   |
| <b>Hepatitis C virus +</b>                     | 5,096  | -0.021                 | 0.980   | 0.891   | 1.077   |
| <b>HIV+</b>                                    | 903    | -0.100                 | 0.904   | 0.741   | 1.104   |
| <b>Unplanned hospitalization during 2012</b>   |        |                        |         |         |         |
| 0                                              | 28,884 |                        | 1       | --      | --      |
| 1                                              | 3,788  | 0.296                  | 1.344   | 1.203   | 1.503   |
| 2                                              | 1,207  | 0.402                  | 1.494   | 1.264   | 1.767   |
| 3                                              | 459    | 0.399                  | 1.490   | 1.159   | 1.915   |
| >3                                             | 402    | 0.569                  | 1.766   | 1.322   | 2.358   |
| <b>Emergency department visits during 2012</b> |        |                        |         |         |         |
| 0                                              | 20,699 |                        | 1       | --      | --      |
| 1-2                                            | 9,712  | 0.185                  | 1.204   | 1.098   | 1.320   |
| 3-5                                            | 3,237  | 0.403                  | 1.496   | 1.319   | 1.698   |
| >5                                             | 1,092  | 0.572                  | 1.773   | 1.462   | 2.149   |
| <b>Skilled nursing facility during 2012</b>    | 1,234  | -0.437                 | 0.646   | 0.555   | 0.751   |
| <b>Constant</b>                                |        | -4.988                 | 0.007   | --      | --      |

Table 5S: Health services utilization by specific hepatic decompensation during 2012

|                                                                 | Specific hepatic decompensation during 2012 |       |       |       |       |       |       |
|-----------------------------------------------------------------|---------------------------------------------|-------|-------|-------|-------|-------|-------|
|                                                                 | EV                                          | HE    | SBP   | HRS   | CHC   | ASC   | PHT   |
| Cases                                                           | 1800                                        | 815   | 293   | 68    | 1.006 | 786   | 1878  |
| Admission rate (x100 patients)                                  | 128.1                                       | 175.1 | 175.1 | 170.6 | 115.0 | 125.1 | 128.5 |
| Average length of hospitalization (days)                        | 10.8                                        | 15.1  | 17.7  | 13.6  | 7.3   | 10.6  | 10.9  |
| Unplanned admission rate (x100 patients)                        | 87.8                                        | 131.0 | 112.6 | 97.1  | 58.7  | 88.5  | 87.0  |
| Patients with unplanned admission (%)                           | 42.2                                        | 55.1  | 51.2  | 52.9  | 35.6  | 45.0  | 43.3  |
| Patients >1 unplanned admission (%)                             | 20.7                                        | 30.8  | 28.3  | 23.5  | 13.5  | 21.0  | 20.9  |
| Emergency visit rates (x100 patients)                           | 208.8                                       | 277.3 | 245.1 | 222.1 | 141.7 | 199.6 | 211.2 |
| Patients with emergency visit (%)                               | 63.7                                        | 70.1  | 69.3  | 63.2  | 57.0  | 61.5  | 65.0  |
| Patients with >1 emergency visits (%)                           | 40.9                                        | 48.5  | 50.2  | 36.8  | 33.9  | 40.7  | 41.8  |
| Gastroenterology/hepatology specialist outpatient visits (mean) | 2.6                                         | 2.6   | 2.7   | 3.3   | 3.4   | 2.5   | 2.5   |
| Other hospital outpatient visits (average)                      | 4.6                                         | 4.2   | 6.0   | 3.8   | 4.5   | 4.6   | 5.2   |
| Primary Care visits (average)                                   | 16.3                                        | 17.9  | 18.4  | 16.3  | 15.6  | 17.7  | 16.1  |
| Users of a skilled nursing facility (%)                         | 14.8                                        | 24.5  | 17.7  | 30.9  | 21.2  | 16.4  | 14.7  |
| Mental Health outpatient visits rate (x100 patients)            | 15.8                                        | 18.9  | 10.9  | 23.5  | 4.6   | 18.2  | 15.4  |
| Psychiatric hospital admission rate (x100 patients)             | 2.1                                         | 1.1   | .7    | 2.9   | .3    | 1.8   | 2.6   |

**EV:** Esophageal varices; **HE:** Encephalopathy; **SBP:** Spontaneous bacterial peritonitis; **HRS:** Hepatorenal syndrome; **CHC:** Hepatocellular carcinoma; **ASC:** Ascites. **PHT:** Portal hypertension;
