# Supplementary material for: Economic burden of cirrhosis in Catalonia: a population-based analysis
Source: PubMed Central journal article supplement — BMJ Open. 2018 Mar 3;8(3):e018012. doi: 10.1136/bmjopen-2017-018012 (PMC5855312; doi:10.1136/bmjopen-2017-018012), 2018-03-03
Supplement: bmjopen-2017-018012supp001.pdf [file bmjopen-2017-018012supp001.pdf]

## SUPPLEMENTARY MATERIAL:

### Appendix 1: Hepatic decompensation codes:

- Encephalopathy: 572.2, 070.2, 070.4, 070.6, 070.71
- Portal hypertension: 572.3
- Hepatorenal syndrome: 572.4
- Spontaneous bacterial peritonitis: 032.83, 567.xx, 569.5
- Hepatocellular carcinoma: 155.0, 155.2, 197.7
- Ascites: 789.5
- Esophageal varices with or without bleeding: 456.0, 456.1, 456.2x

Table 1S: Mean price by activity

|                          |                          |
|--------------------------|--------------------------|
| Primary care visits      |                          |
| Physician                | € 38.04 per visit        |
| Home visit (physician)   | € 45.65 per visit        |
| Nurse                    | € 22.83 per visit        |
| Home visit (nurse)       | € 27.39 per visit        |
| Specialist visit         | € 58.46 per visit        |
| Mental health visit      | € 75.31 per visit        |
| Emergency room visit     | € 106.38 per visit       |
| Hospital admission       | € 2,150.64 per admission |
| Skilled nursing facility |                          |
| Long term                | € 50.22 per day          |
| Convalescence            | € 86.91 per day          |

|                                   |                        |
|-----------------------------------|------------------------|
| Mental health admission           |                        |
| Acute                             | € 183.31 per day       |
| Sub-acute                         | € 115.35 per day       |
| Minor outpatient surgery          | € 156.84 per surgery   |
| Outpatient Care Clinics           | € 169.35 per day       |
| Hospital at home                  | € 950.00 per admission |
| Outpatient rehabilitation         | € 213.39 per session   |
| Non-urgent medical transportation | € 61.34 per act        |
| Home oxygen therapy               | € 49.12 per session    |
| Dialysis                          | € 151.20 per session   |

Table 2S: Demographic characteristics stratified by specific hepatic decompensation during 2012

|                                  | TOTAL      | Specific hepatic decompensation during 2012 |            |            |            |            |            |               |
|----------------------------------|------------|---------------------------------------------|------------|------------|------------|------------|------------|---------------|
|                                  |            | EV                                          | HE         | SBP        | HRS        | CHC        | ASC        | PHT           |
| Cases                            | 4,048      | 1800                                        | 815        | 293        | 68         | 1006       | 786        | 1878          |
| Patients / year                  | 3,635      | 1613                                        | 664        | 252        | 49         | 852        | 689        | 1697          |
| Age* (mean±SD)<br>(years)        | 63.7 ±12.7 | 62.6 ±12.6                                  | 63.4 ±12.3 | 62.2 ±12.5 | 61.8 ±12.8 | 68.3 ±10.7 | 62.1 ±12.3 | 61.8<br>±12.8 |
| Women (%)                        | 33.4       | 31.3                                        | 36.0       | 30.7       | 33.8       | 27.7       | 34.6       | 32.9          |
| <b>Morbidity</b>                 |            |                                             |            |            |            |            |            |               |
| Number of chronic co-morbidities |            | 6.5                                         | 7.1        | 6.8        | 7.5        | 7.3        | 6.0        | 6.5           |
| Stratification groups (AMG)      |            |                                             |            |            |            |            |            |               |
| Very high-risk stratum           |            | 27.9                                        | 40.9       | 36.9       | 44.1       | 28.0       | 26.8       | 29.1          |
| High risk stratum                |            | 45.5                                        | 42.8       | 43.3       | 45.6       | 56.2       | 40.5       | 44.3          |
| Moderate risk stratum            |            | 23.2                                        | 14.1       | 16.4       | 10.3       | 15.5       | 23.8       | 22.6          |
| Low risk stratum                 |            | 3.4                                         | 2.2        | 3.4        | 0.0        | 0.3        | 8.9        | 4.0           |

**EV:** Esophageal Varices; **HE:** Encephalopathy; **SBP:** Spontaneous bacterial peritonitis; **HRS:** Hepatorenal syndrome; **CHC:** Hepatocellular carcinoma; **ASC:** Ascites. **PHT:** Portal Hypertension; **AMG:** Adjusted Morbidity Groups.

Table 3S: Multivariable logistic regression analyzing factors associated with mortality

|                                                | n      | $\beta$<br>coefficient | OR     | 95% CI |        |
|------------------------------------------------|--------|------------------------|--------|--------|--------|
| <b>Sex</b>                                     |        |                        |        |        |        |
| Male                                           | 20,231 |                        | 1      | --     | --     |
| Female                                         | 14,509 | -0.318                 | 0.727  | 0.658  | 0.804  |
| <b>Age group</b>                               |        |                        |        |        |        |
| 18-44 years old                                | 4,214  |                        | 1      | --     | --     |
| 45-64 years old                                | 15,671 | 0.338                  | 1.402  | 1.058  | 1.857  |
| 65-74 years old                                | 8,132  | 1.849                  | 1.386  | 2.465  | 1.849  |
| 75-84 years old                                | 5,497  | 2.761                  | 2.069  | 3.684  | 2.761  |
| >84 years old                                  | 1,226  | 5.992                  | 4.368  | 8.220  | 5.992  |
| <b>Hepatic decompensation</b>                  |        |                        |        |        |        |
| Compensated group                              | 25,299 |                        | 1      | --     | --     |
| Previous decompensation group                  | 5,393  | 0.314                  | 1.369  | 1.202  | 1.558  |
| Recent decompensation group                    | 4,048  | 2.030                  | 1.792  | 2.299  | 2.030  |
| <b>Risk stratum (morbidity burden)</b>         |        |                        |        |        |        |
| Low risk stratum                               | 7,724  |                        | 1      | --     | --     |
| Moderate risk stratum                          | 12,367 | 0.951                  | 2.588  | 1.747  | 3.835  |
| High risk stratum                              | 10,622 | 11.348                 | 7.805  | 16.500 | 11.348 |
| Very high risk stratum                         | 4,027  | 42.673                 | 29.180 | 62.403 | 42.673 |
| <b>Chronic kidney disease</b>                  | 2,542  | 0.790                  | 0.694  | 0.899  | 0.790  |
| <b>Hepatitis C virus +</b>                     | 5,096  | 1.213                  | 1.081  | 1.360  | 1.213  |
| <b>HIV+</b>                                    | 903    | 0.973                  | 0.743  | 1.274  | 0.973  |
| <b>Unplanned hospitalization during 2012</b>   |        |                        |        |        |        |
| 0                                              | 28,884 |                        | 1      | --     | --     |
| 1                                              | 3,788  | 0.224                  | 1.251  | 1.086  | 1.440  |
| 2                                              | 1,207  | 1.201                  | 0.987  | 1.461  | 1.201  |
| 3                                              | 459    | 1.150                  | 0.879  | 1.504  | 1.150  |
| >3                                             | 402    | 1.560                  | 1.166  | 2.088  | 1.560  |
| <b>Emergency department visits during 2012</b> |        |                        |        |        |        |
| 0                                              | 20,699 |                        | 1      | --     | --     |
| 1-2                                            | 9,712  | 0.073                  | 1.076  | 0.945  | 1.225  |
| 3-5                                            | 3,237  | 1.497                  | 1.271  | 1.762  | 1.497  |
| >5                                             | 1,092  | 1.576                  | 1.253  | 1.982  | 1.576  |
| <b>Skilled nursing facility during 2012</b>    | 1,234  | 2.127                  | 1.832  | 2.470  | 2.127  |
| <b>Constant</b>                                |        | 0.003                  | 0.003  | --     | --     |

Table 4S: Multivariable logistic regression analyzing factors associated with hospitalization for any cause

|                                                | n      | $\beta$<br>coefficient | OR      | 95% CI  |         |
|------------------------------------------------|--------|------------------------|---------|---------|---------|
| <b>Sex</b>                                     |        |                        |         |         |         |
| Male                                           | 20,231 |                        | 1       | --      | --      |
| Female                                         | 14,509 | -0.009                 | 0.991   | 0.918   | 1.069   |
| <b>Age group</b>                               |        |                        |         |         |         |
| 18-44 years old                                | 4,214  |                        | 1       | --      | --      |
| 45-64 years old                                | 15,671 | -0.369                 | 0.691   | 0.590   | 0.810   |
| 65-74 years old                                | 8,132  | -0.540                 | 0.583   | 0.493   | 0.689   |
| 75-84 years old                                | 5,497  | -0.476                 | 0.621   | 0.523   | 0.738   |
| >84 years old                                  | 1,226  | -0.315                 | 0.730   | 0.587   | 0.907   |
| <b>Hepatic decompensation</b>                  |        |                        |         |         |         |
| Compensated group                              | 25,299 |                        | 1       | --      | --      |
| Previous decompensation group                  | 5,393  | 0.405                  | 1.499   | 1.362   | 1.650   |
| Recent decompensation group                    | 4,048  | 0.714                  | 2.041   | 1.840   | 2.265   |
| <b>Risk stratum (morbidity burden)</b>         |        |                        |         |         |         |
| Low risk stratum                               | 7,724  |                        | 1       | --      | --      |
| Moderate risk stratum                          | 12,367 | 1.609                  | 4.997   | 3.653   | 6.837   |
| High risk stratum                              | 10,622 | 3.759                  | 42.917  | 31.679  | 58.141  |
| Very high risk stratum                         | 4,027  | 5.879                  | 357.497 | 261.233 | 489.235 |
| <b>Chronic kidney disease</b>                  | 2,542  | -0.549                 | 0.578   | 0.515   | 0.647   |
| <b>Hepatitis C virus +</b>                     | 5,096  | -0.021                 | 0.980   | 0.891   | 1.077   |
| <b>HIV+</b>                                    | 903    | -0.100                 | 0.904   | 0.741   | 1.104   |
| <b>Unplanned hospitalization during 2012</b>   |        |                        |         |         |         |
| 0                                              | 28,884 |                        | 1       | --      | --      |
| 1                                              | 3,788  | 0.296                  | 1.344   | 1.203   | 1.503   |
| 2                                              | 1,207  | 0.402                  | 1.494   | 1.264   | 1.767   |
| 3                                              | 459    | 0.399                  | 1.490   | 1.159   | 1.915   |
| >3                                             | 402    | 0.569                  | 1.766   | 1.322   | 2.358   |
| <b>Emergency department visits during 2012</b> |        |                        |         |         |         |
| 0                                              | 20,699 |                        | 1       | --      | --      |
| 1-2                                            | 9,712  | 0.185                  | 1.204   | 1.098   | 1.320   |
| 3-5                                            | 3,237  | 0.403                  | 1.496   | 1.319   | 1.698   |
| >5                                             | 1,092  | 0.572                  | 1.773   | 1.462   | 2.149   |
| <b>Skilled nursing facility during 2012</b>    | 1,234  | -0.437                 | 0.646   | 0.555   | 0.751   |
| <b>Constant</b>                                |        | -4.988                 | 0.007   | --      | --      |

Table 5S: Health services utilization by specific hepatic decompensation during 2012

|                                                                 | Specific hepatic decompensation during 2012 |       |       |       |       |       |       |
|-----------------------------------------------------------------|---------------------------------------------|-------|-------|-------|-------|-------|-------|
|                                                                 | EV                                          | HE    | SBP   | HRS   | CHC   | ASC   | PHT   |
| Cases                                                           | 1800                                        | 815   | 293   | 68    | 1.006 | 786   | 1878  |
| Admission rate (x100 patients)                                  | 128.1                                       | 175.1 | 175.1 | 170.6 | 115.0 | 125.1 | 128.5 |
| Average length of hospitalization (days)                        | 10.8                                        | 15.1  | 17.7  | 13.6  | 7.3   | 10.6  | 10.9  |
| Unplanned admission rate (x100 patients)                        | 87.8                                        | 131.0 | 112.6 | 97.1  | 58.7  | 88.5  | 87.0  |
| Patients with unplanned admission (%)                           | 42.2                                        | 55.1  | 51.2  | 52.9  | 35.6  | 45.0  | 43.3  |
| Patients >1 unplanned admission (%)                             | 20.7                                        | 30.8  | 28.3  | 23.5  | 13.5  | 21.0  | 20.9  |
| Emergency visit rates (x100 patients)                           | 208.8                                       | 277.3 | 245.1 | 222.1 | 141.7 | 199.6 | 211.2 |
| Patients with emergency visit (%)                               | 63.7                                        | 70.1  | 69.3  | 63.2  | 57.0  | 61.5  | 65.0  |
| Patients with >1 emergency visits (%)                           | 40.9                                        | 48.5  | 50.2  | 36.8  | 33.9  | 40.7  | 41.8  |
| Gastroenterology/hepatology specialist outpatient visits (mean) | 2.6                                         | 2.6   | 2.7   | 3.3   | 3.4   | 2.5   | 2.5   |
| Other hospital outpatient visits (average)                      | 4.6                                         | 4.2   | 6.0   | 3.8   | 4.5   | 4.6   | 5.2   |
| Primary Care visits (average)                                   | 16.3                                        | 17.9  | 18.4  | 16.3  | 15.6  | 17.7  | 16.1  |
| Users of a skilled nursing facility (%)                         | 14.8                                        | 24.5  | 17.7  | 30.9  | 21.2  | 16.4  | 14.7  |
| Mental Health outpatient visits rate (x100 patients)            | 15.8                                        | 18.9  | 10.9  | 23.5  | 4.6   | 18.2  | 15.4  |
| Psychiatric hospital admission rate (x100 patients)             | 2.1                                         | 1.1   | .7    | 2.9   | .3    | 1.8   | 2.6   |

**EV:** Esophageal varices; **HE:** Encephalopathy; **SBP:** Spontaneous bacterial peritonitis; **HRS:** Hepatorenal syndrome; **CHC:** Hepatocellular carcinoma; **ASC:** Ascites. **PHT:** Portal hypertension;
